# Supplementary material for: sbgntikz—a TikZ library to draw SBGN maps
Source: Oxford University Press journal article supplement (doi:10.1093/bioinformatics/btz287), 2019-04-17

# sbgn tikz – a TikZ library to draw SBGN maps

Supplementary material

Adrien Rougny<sup>1,2</sup>

<sup>1</sup>Biotechnology Research Institute for Drug Discovery, National Institute of Advanced Industrial Science and Technology (AIST), Aomi, Tokyo 135-0064, Japan

<sup>2</sup>Com. Bio Big Data Open Innovation Lab. (CBBD-OIL), AIST, Aomi, Tokyo 135-0064, Japan

The present document gives a number of SBGN maps drawn and rendered with *sbgn tikz*. All maps are taken from <https://github.com/sbgn/libsbgn/tree/master/example-files>. The first four maps were redrawn using *sbgn tikz* (files are available at <https://github.com/Adrienrougny/sbgn tikz/tree/master/examples>). These maps and the following ones were also automatically converted and rendered from their SBGN-ML version using the SBGN-ML to *sbgn tikz* converter (files are available at <https://github.com/Adrienrougny/sbgn tikz/tree/master/converter/examples>). For all maps, we also provide their SBGN-ED version, for comparison (SBGN-ED is one of the most used software for visualising and editing maps, and almost the only software supporting all three SBGN languages).

# 1 Effect of depolarization on calcium and calmodulin (ER map)

## 1.1 Re-written and rendered directly with sbgntikz

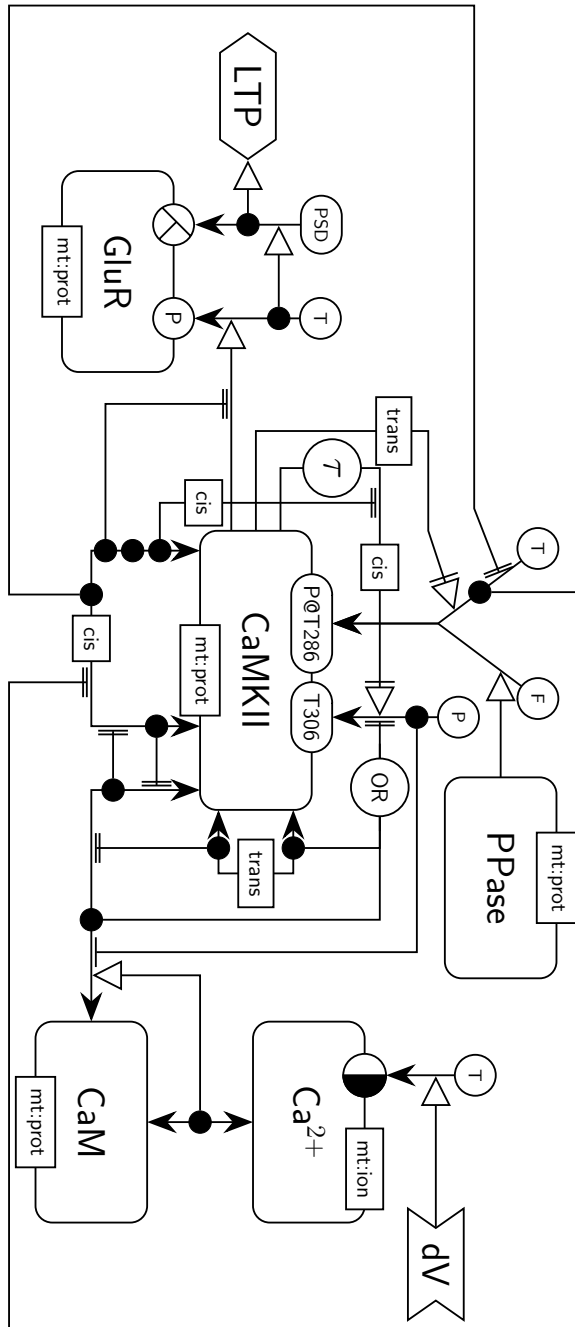

## 1.2 Rendered with the SBGN-ML to sbgntikz converter

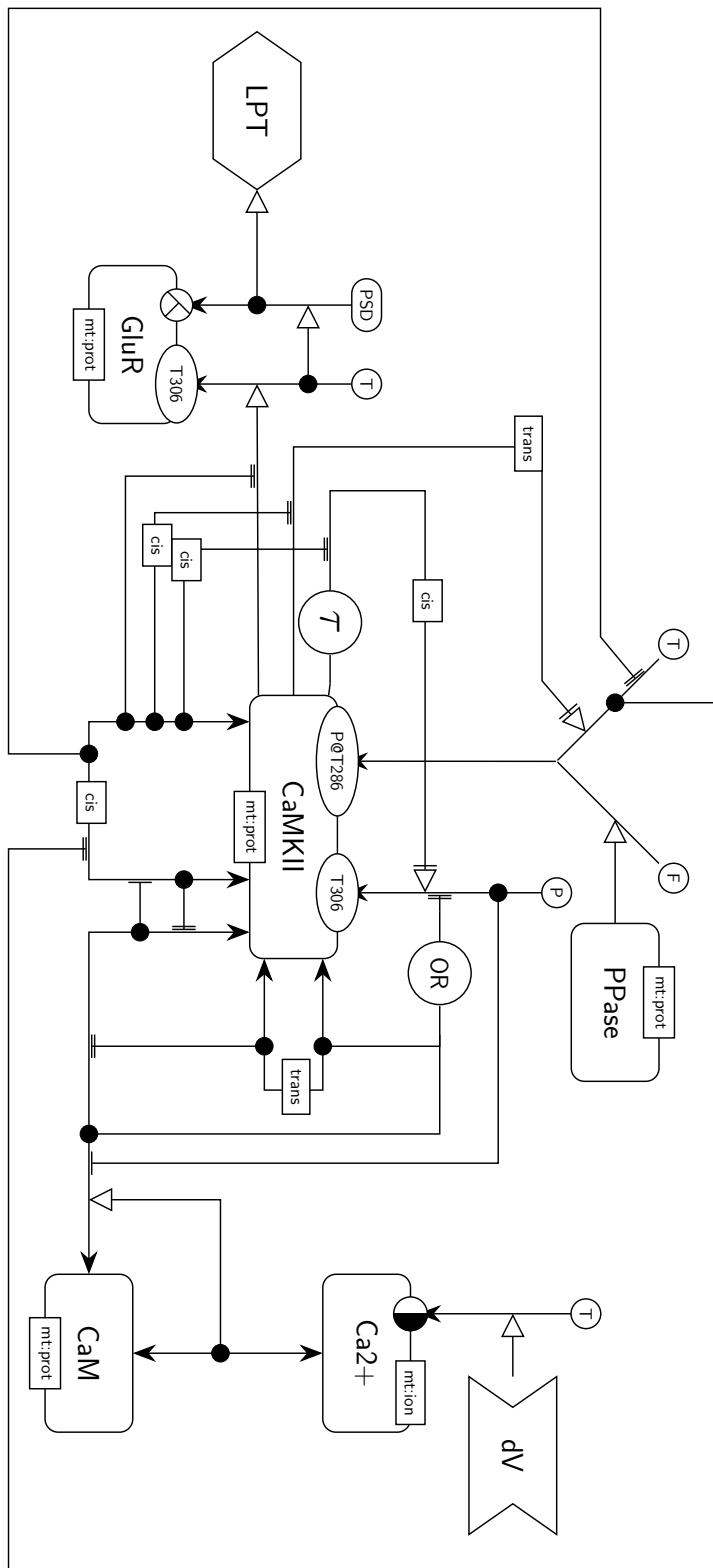

### 1.3 Rendered with the SBGN-ML to sbgnitzkz converter with the tidy option

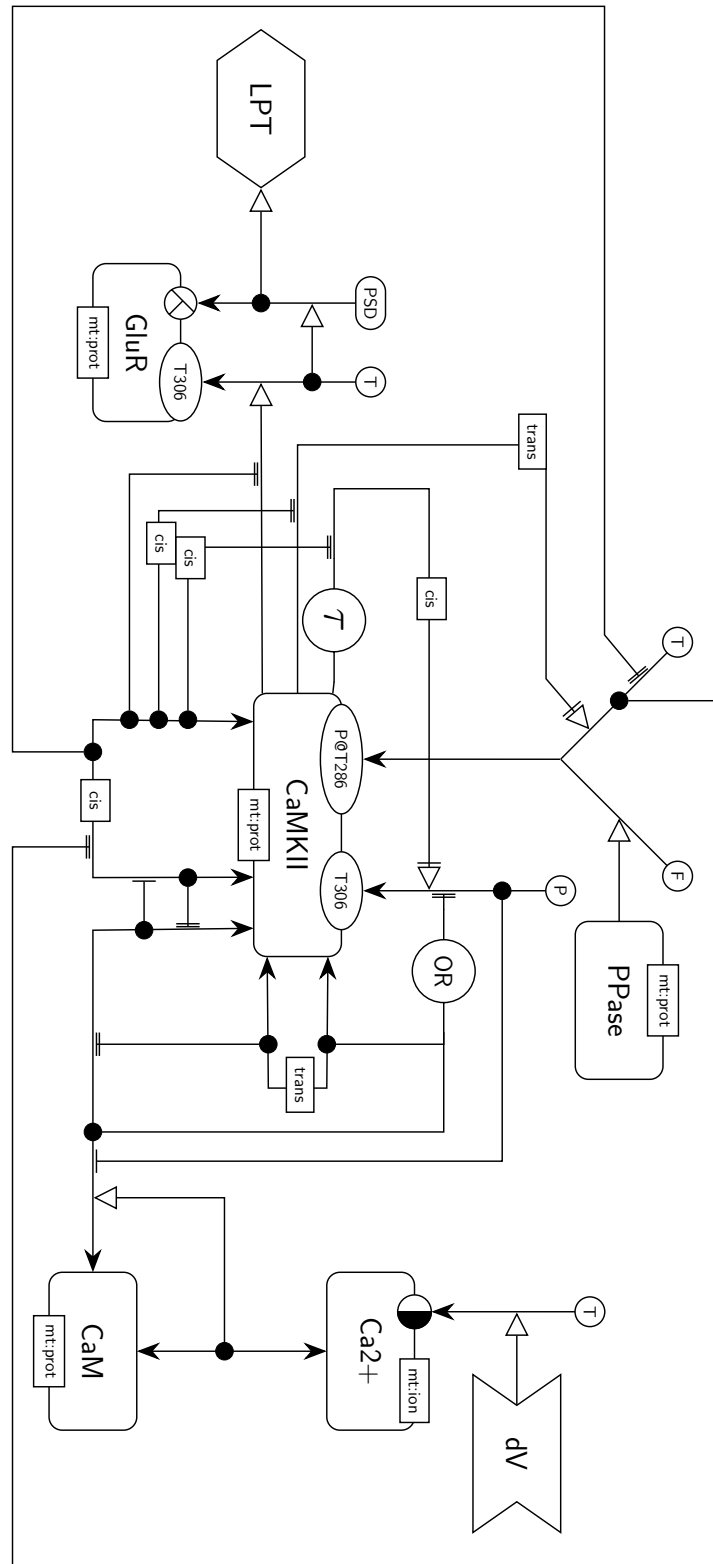

# 1.4 Rendered with SBGN-ED

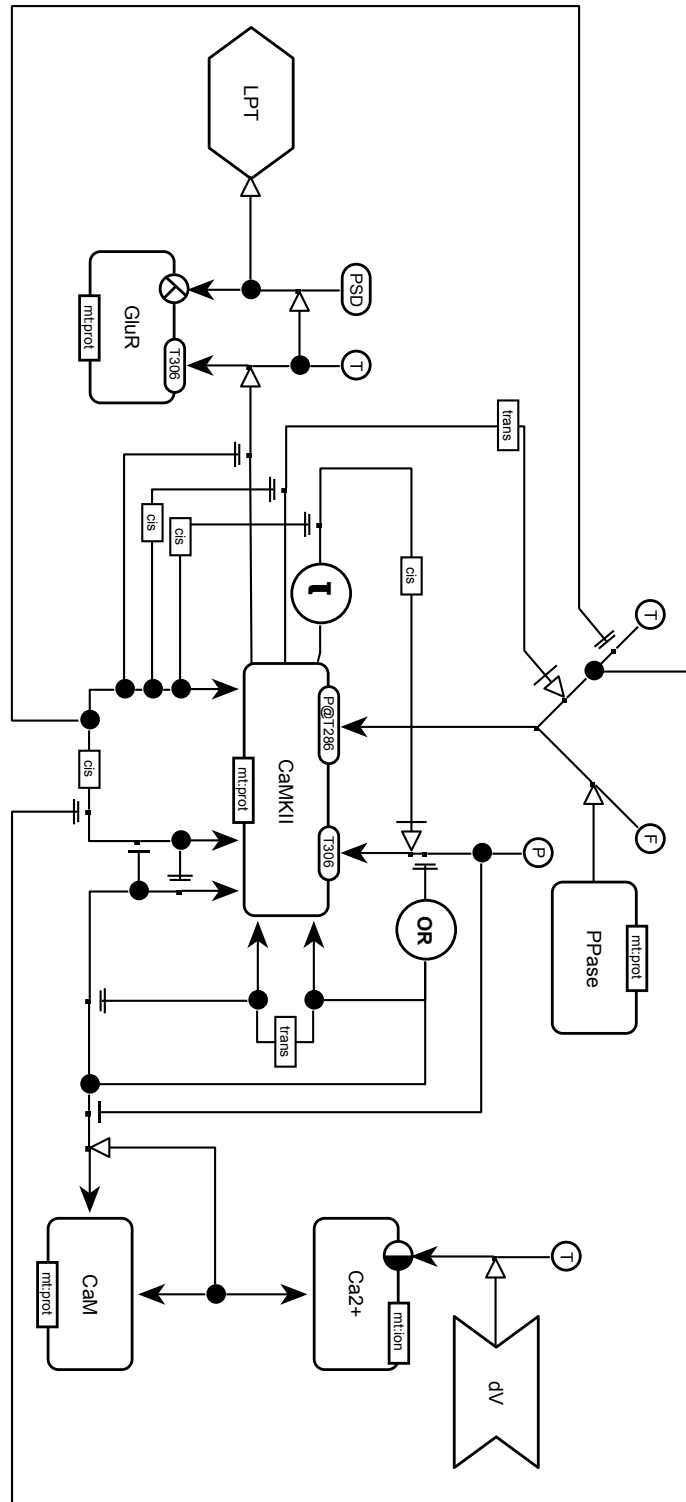

## 2 Regulation of IRF1 gene expression (PD map)

### 2.1 Re-written and rendered directly with sbgntikz

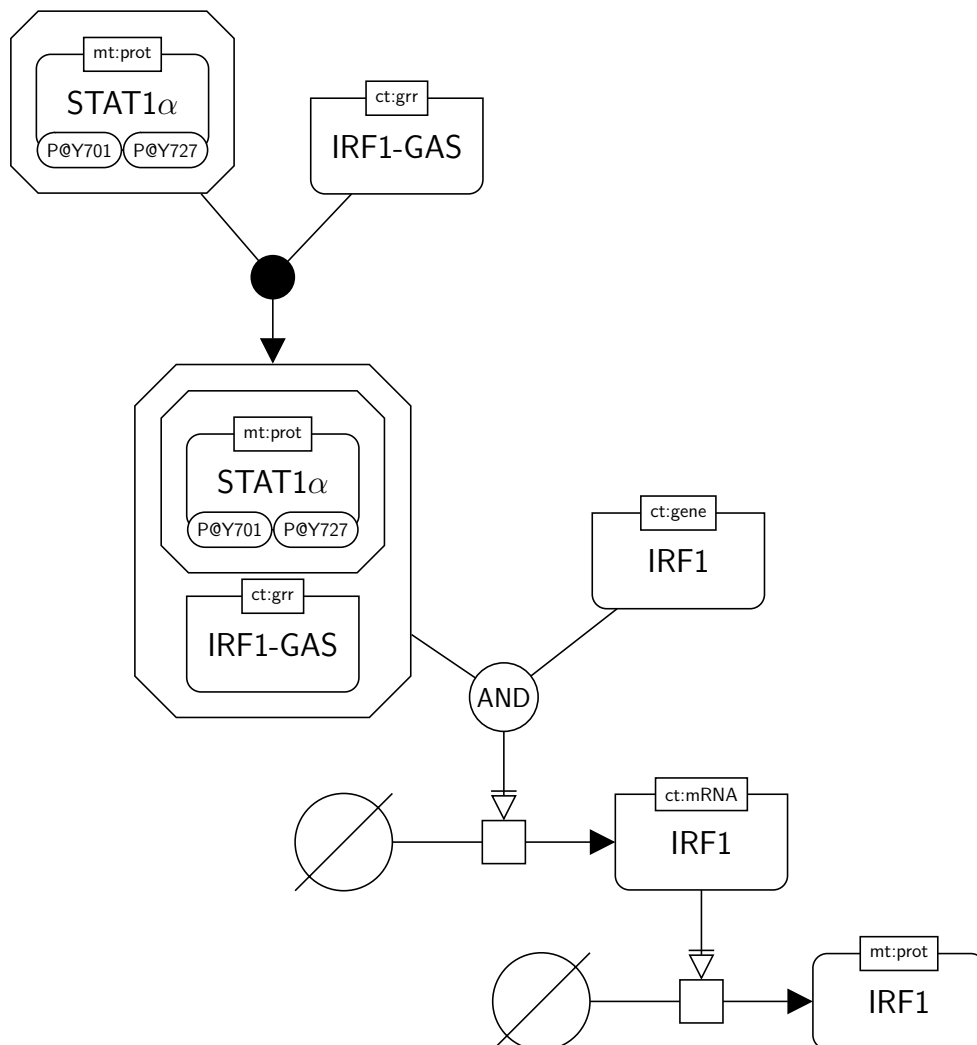

## 2.2 Rendered with the SBGN-ML to sbgntikz converter

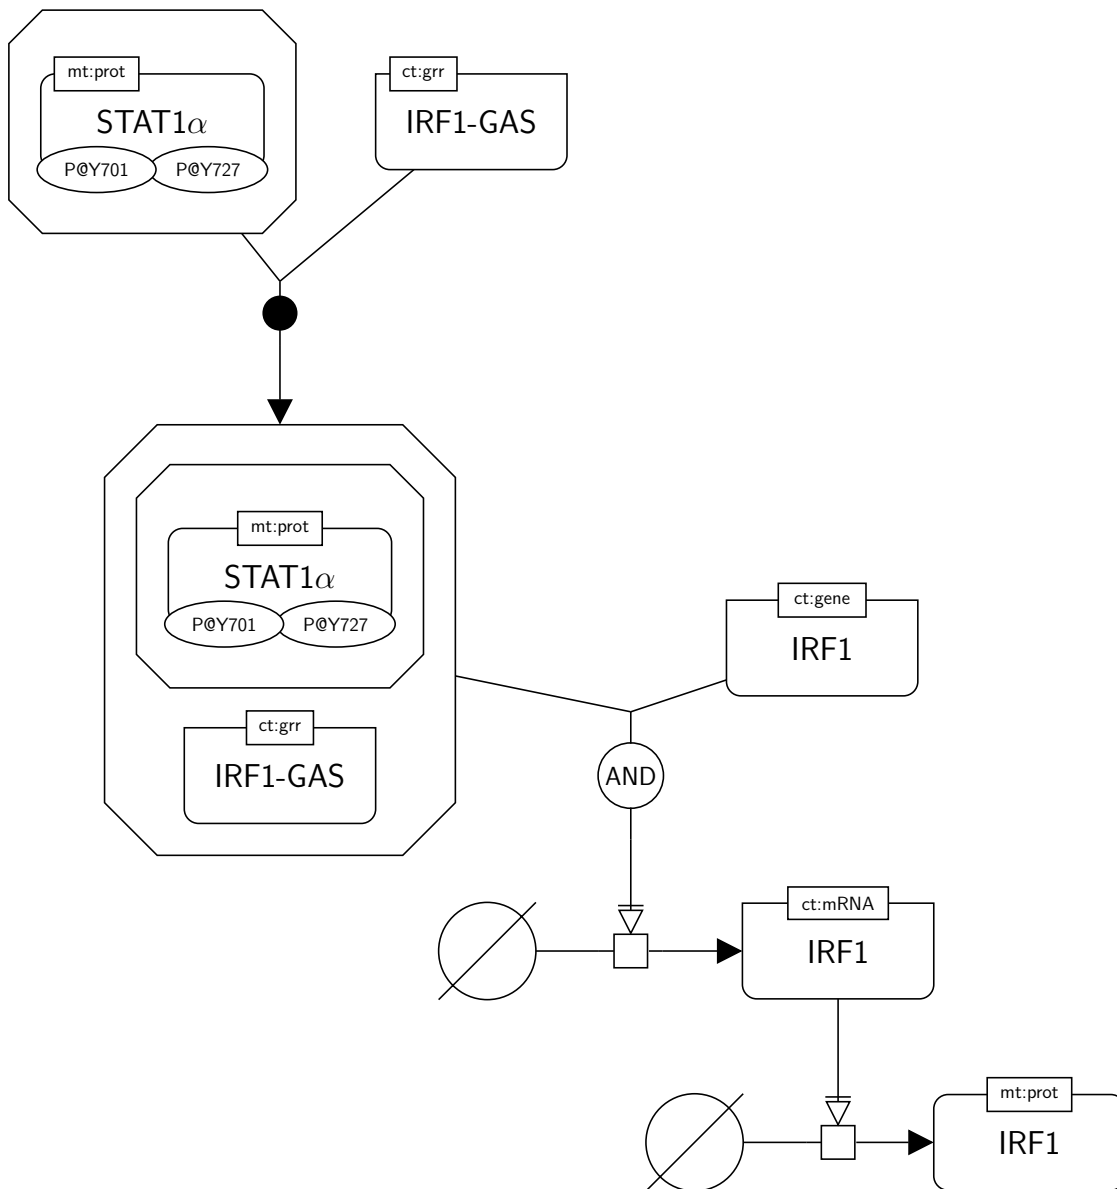

### 2.3 Rendered with the SBGN-ML to sbgntikz converter with the tidy option

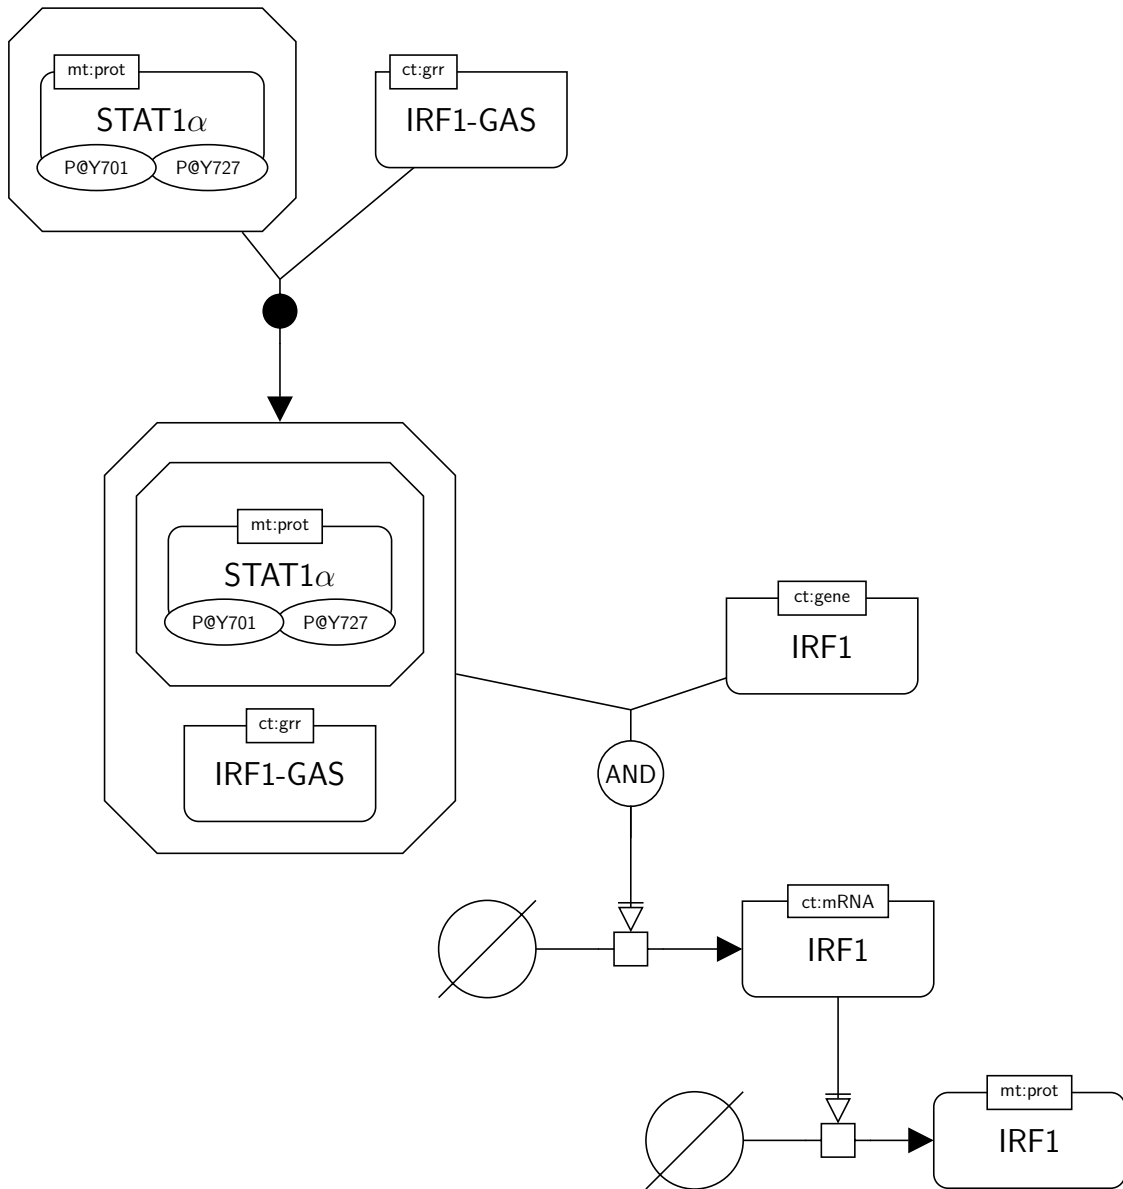



## 2.4 Rendered with SBGN-ED

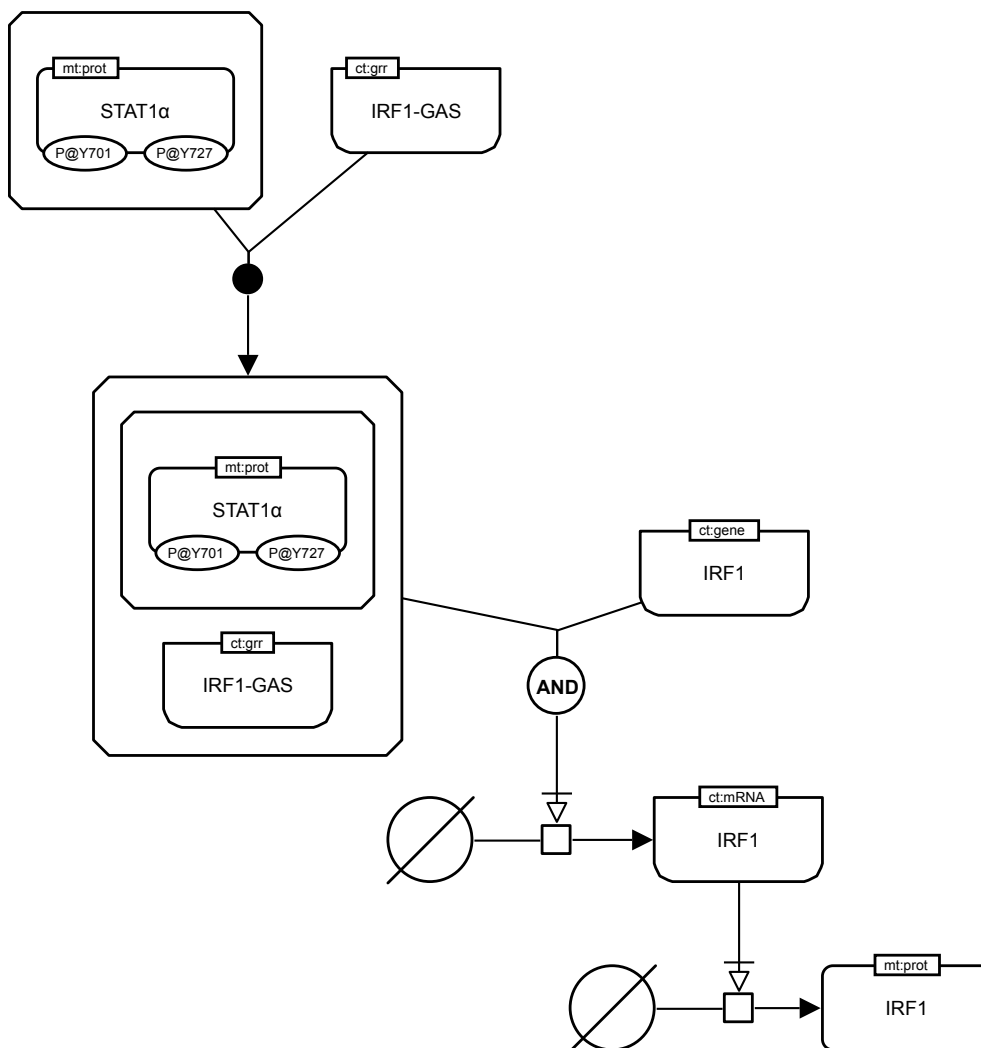

### 3 Insulin receptor-induced signaling (PD map)

#### 3.1 Re-written and rendered directly with sbgntikz

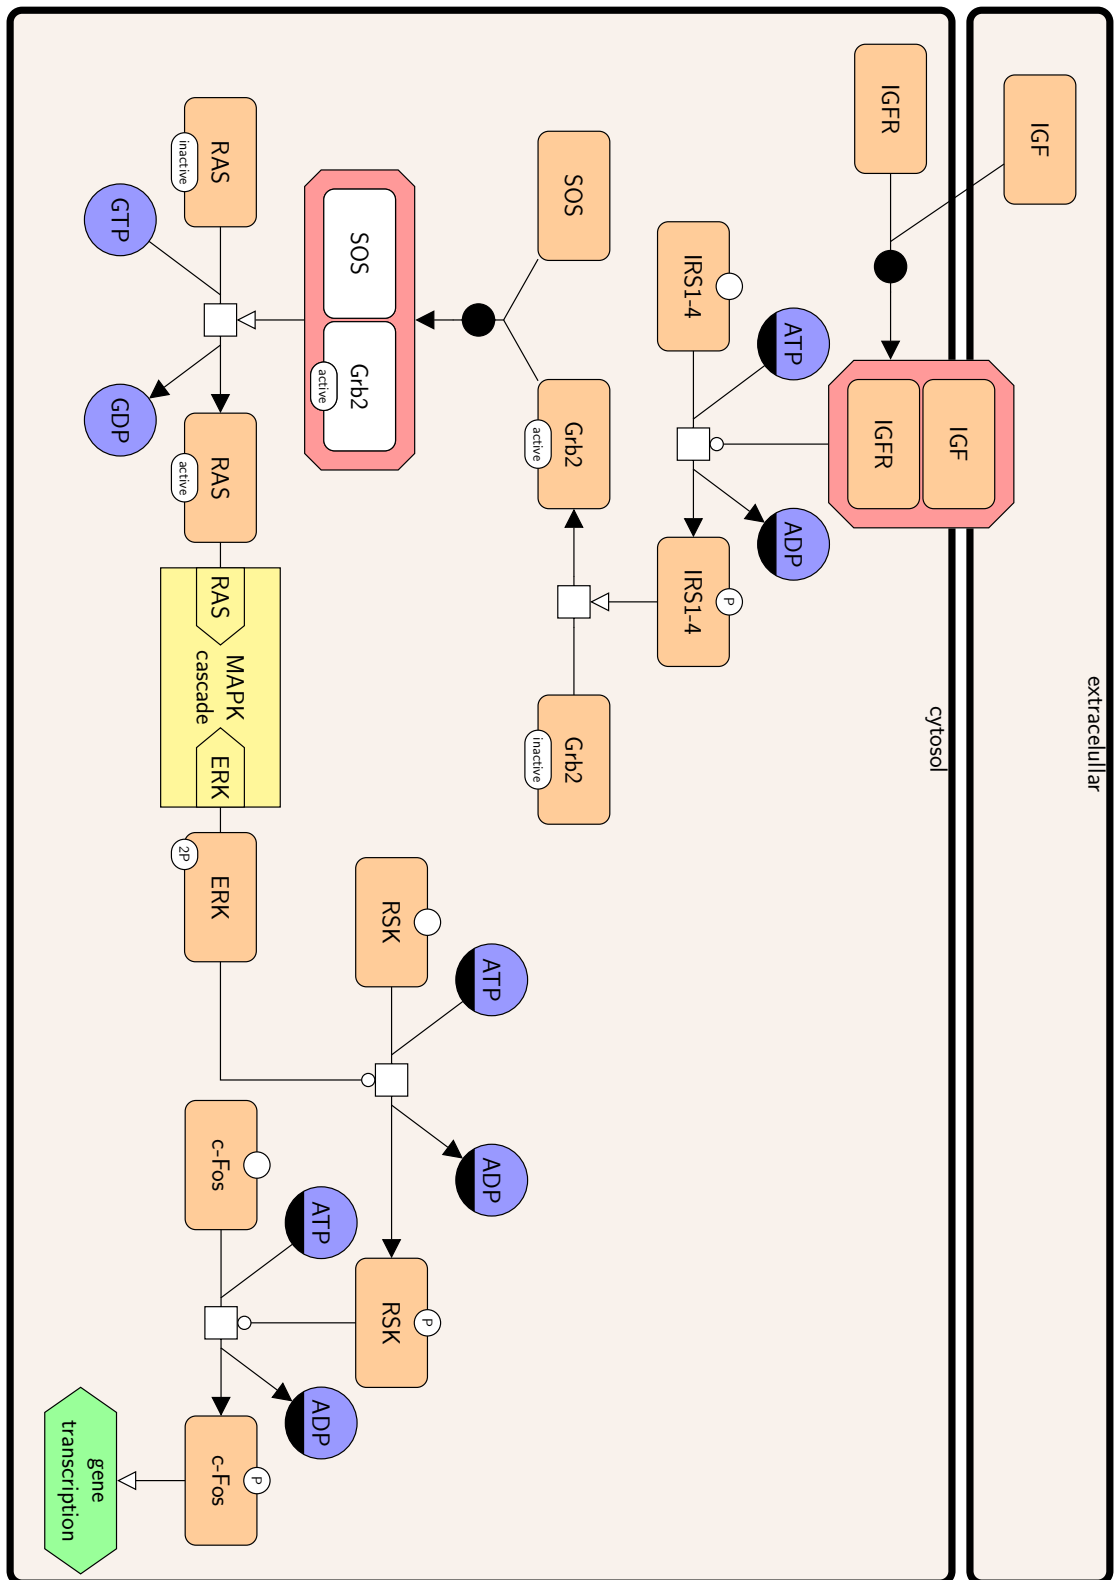

### 3.2 Rendered with the SBGN-ML to sbgntikz converter

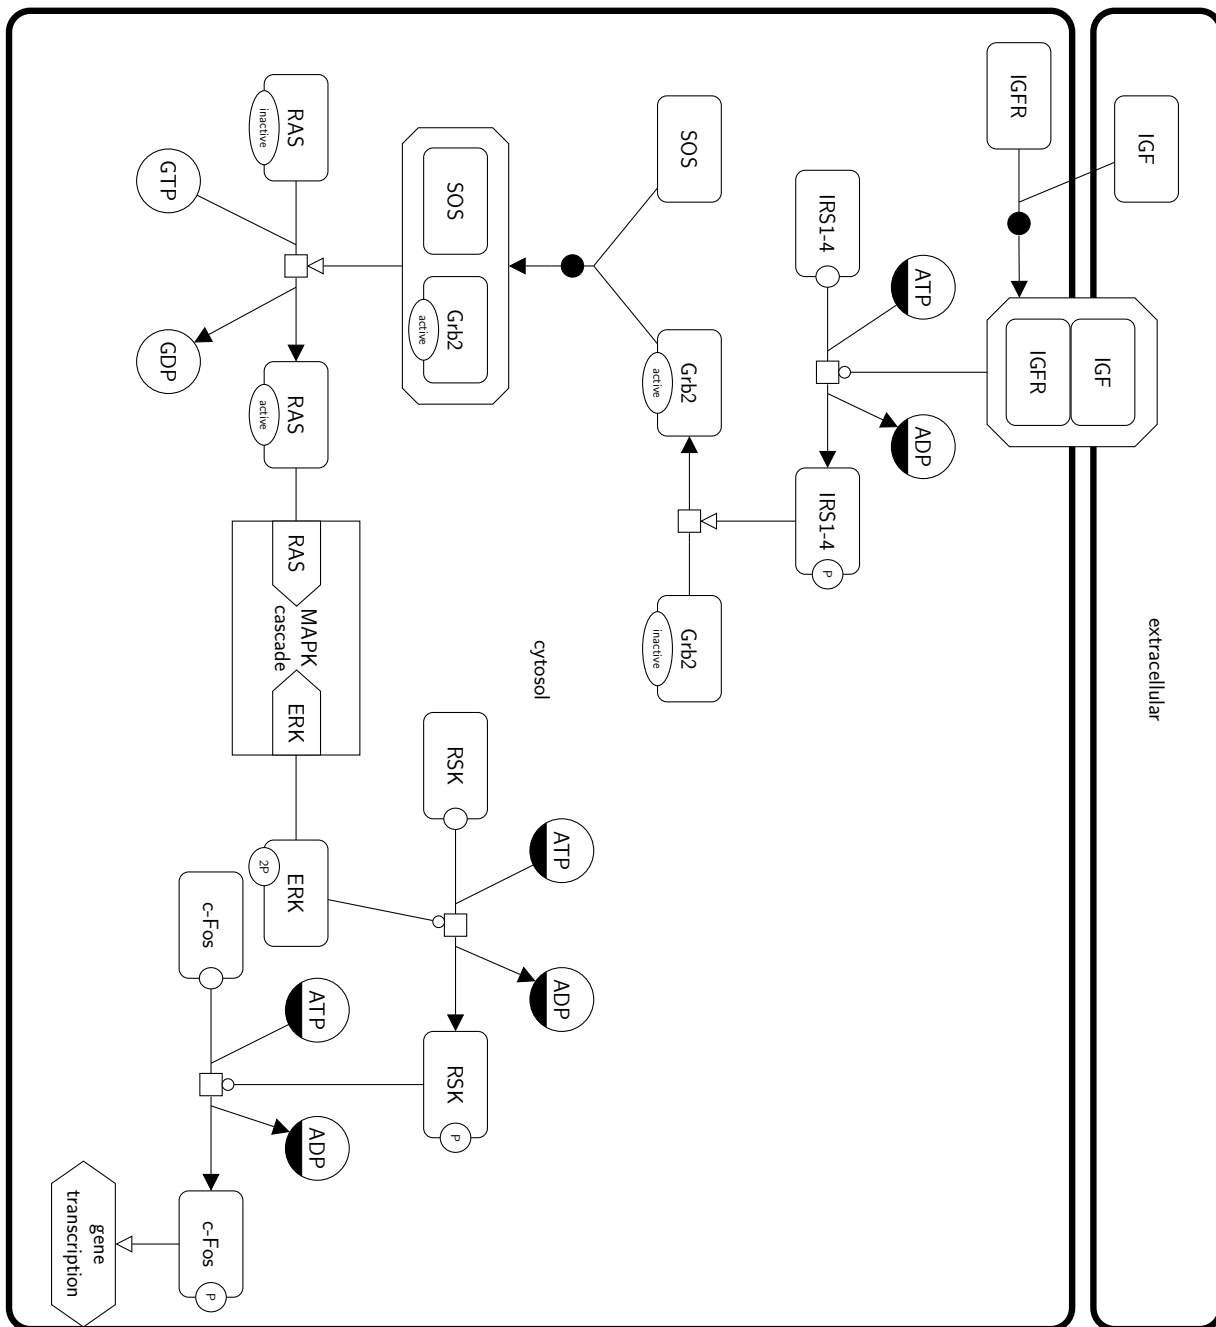

### 3.3 Rendered with the SBGN-ML to sbgntikz converter with the tidy option

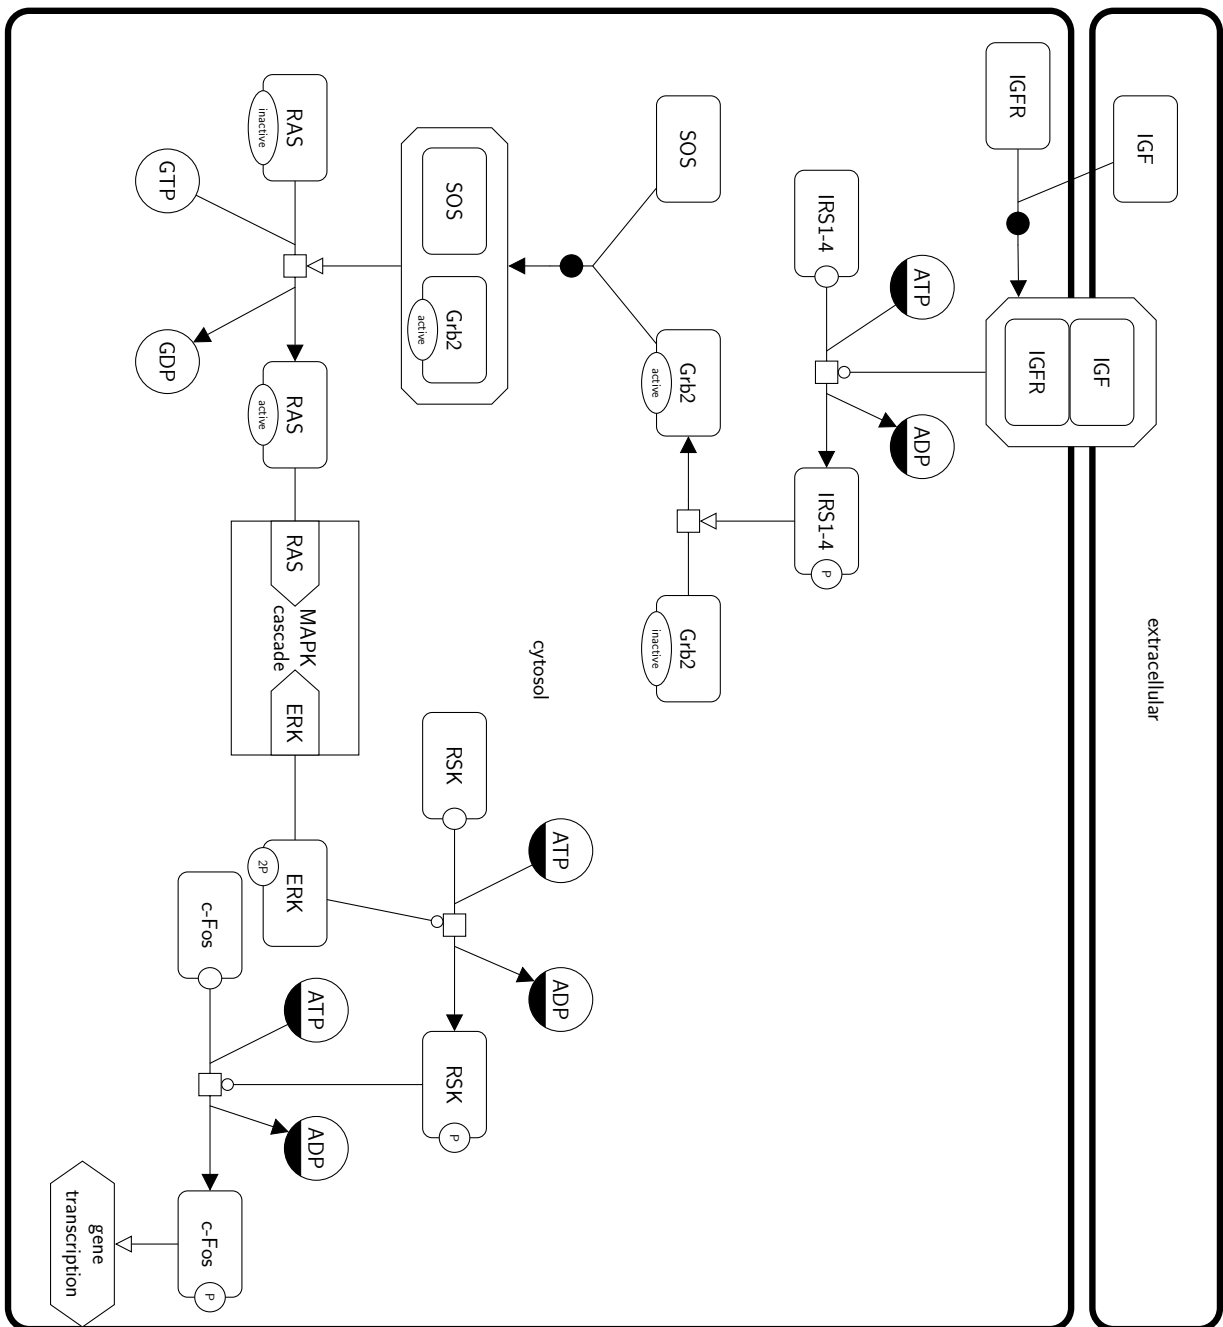

### 3.4 Rendered with SBGN-ED

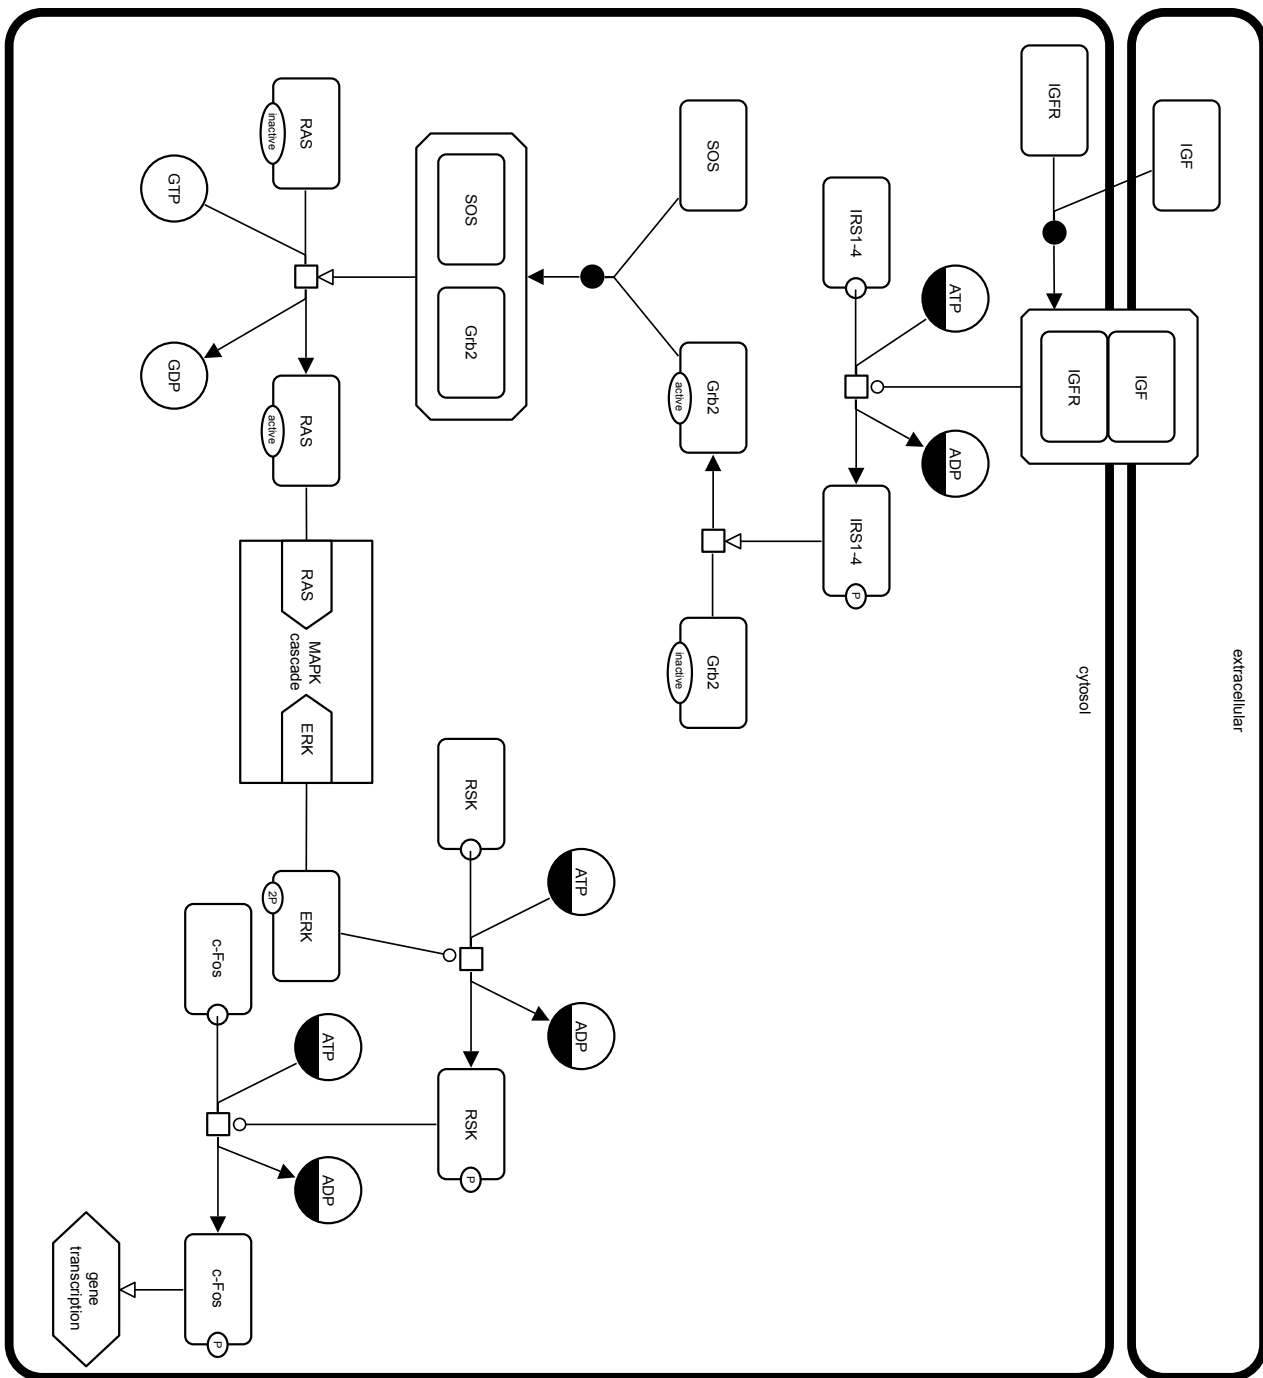

## 4 TGF $\beta$ -induced metastasis (AF map)

### 4.1 Re-written and rendered directly with sbgtikz

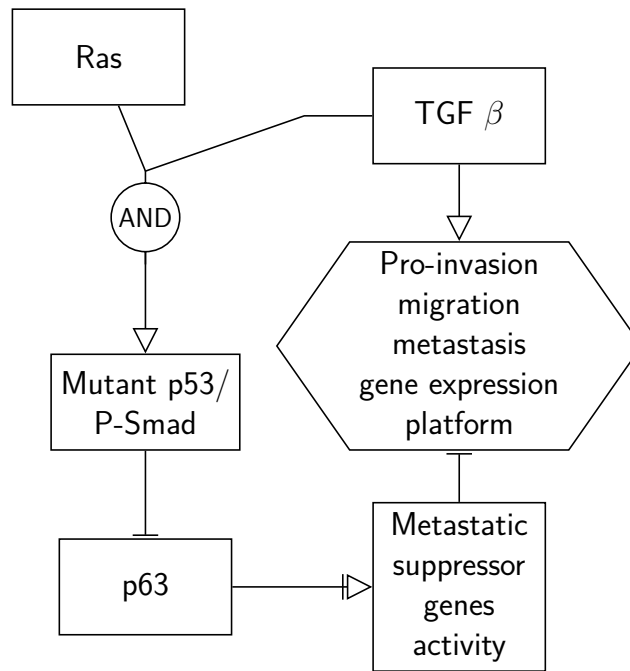

### 4.2 Rendered with the SBGN-ML to sbgtikz converter

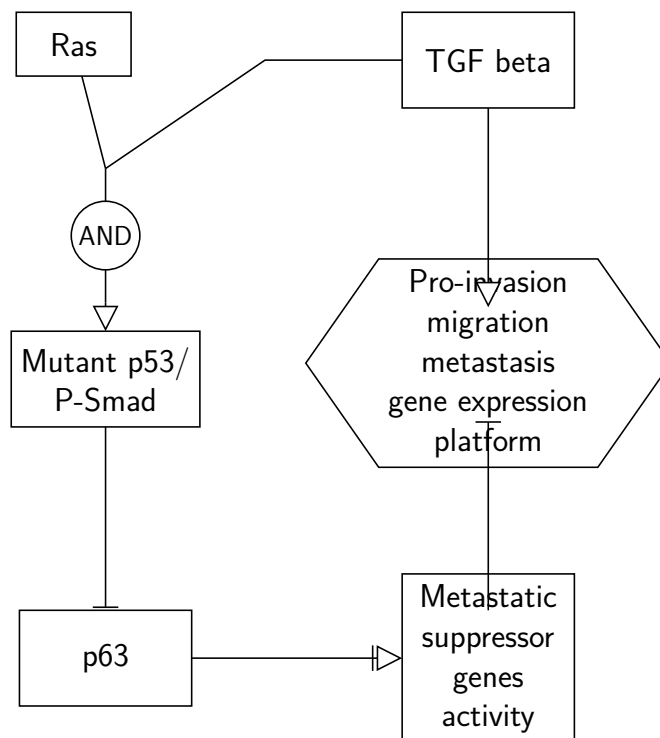

#### 4.3 Rendered with the SBGN-ML to sbgntikz converter with the tidy option

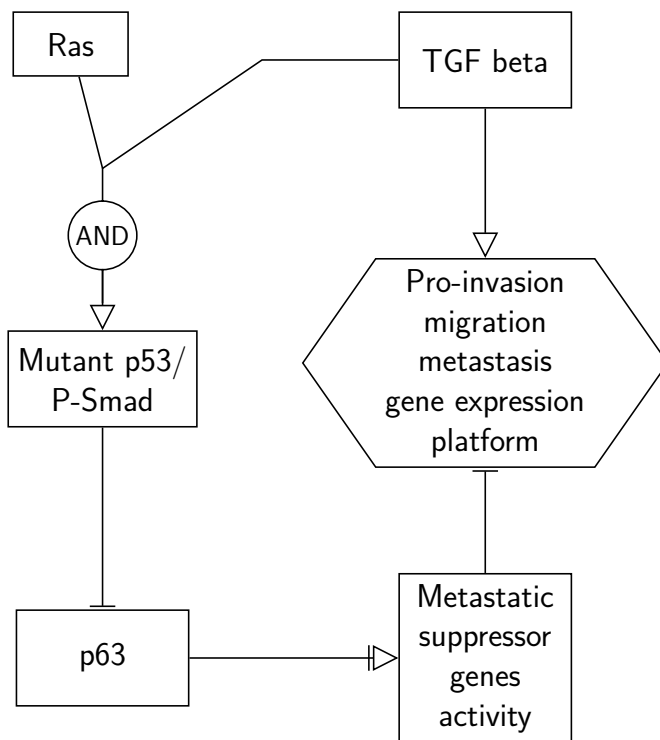

#### 4.4 Rendered with SBGN-ED

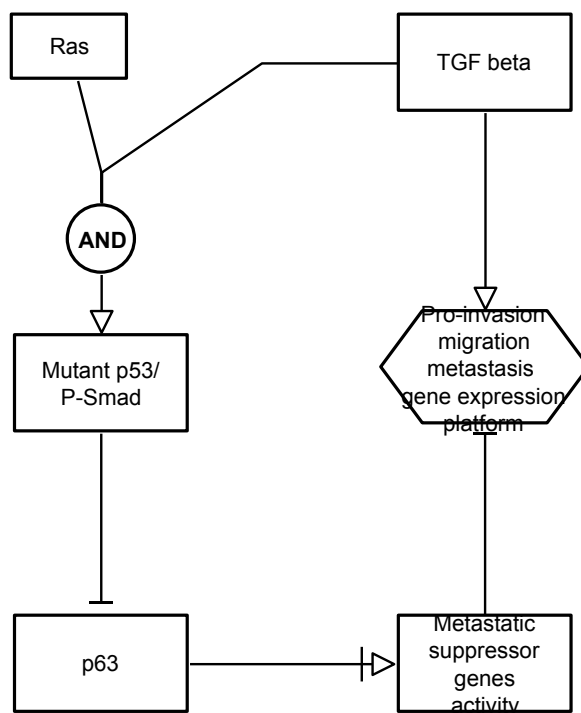

## 5 Central plant metabolism (PD map)

### 5.1 Rendered with the SBGN-ML to sbgnviz converter

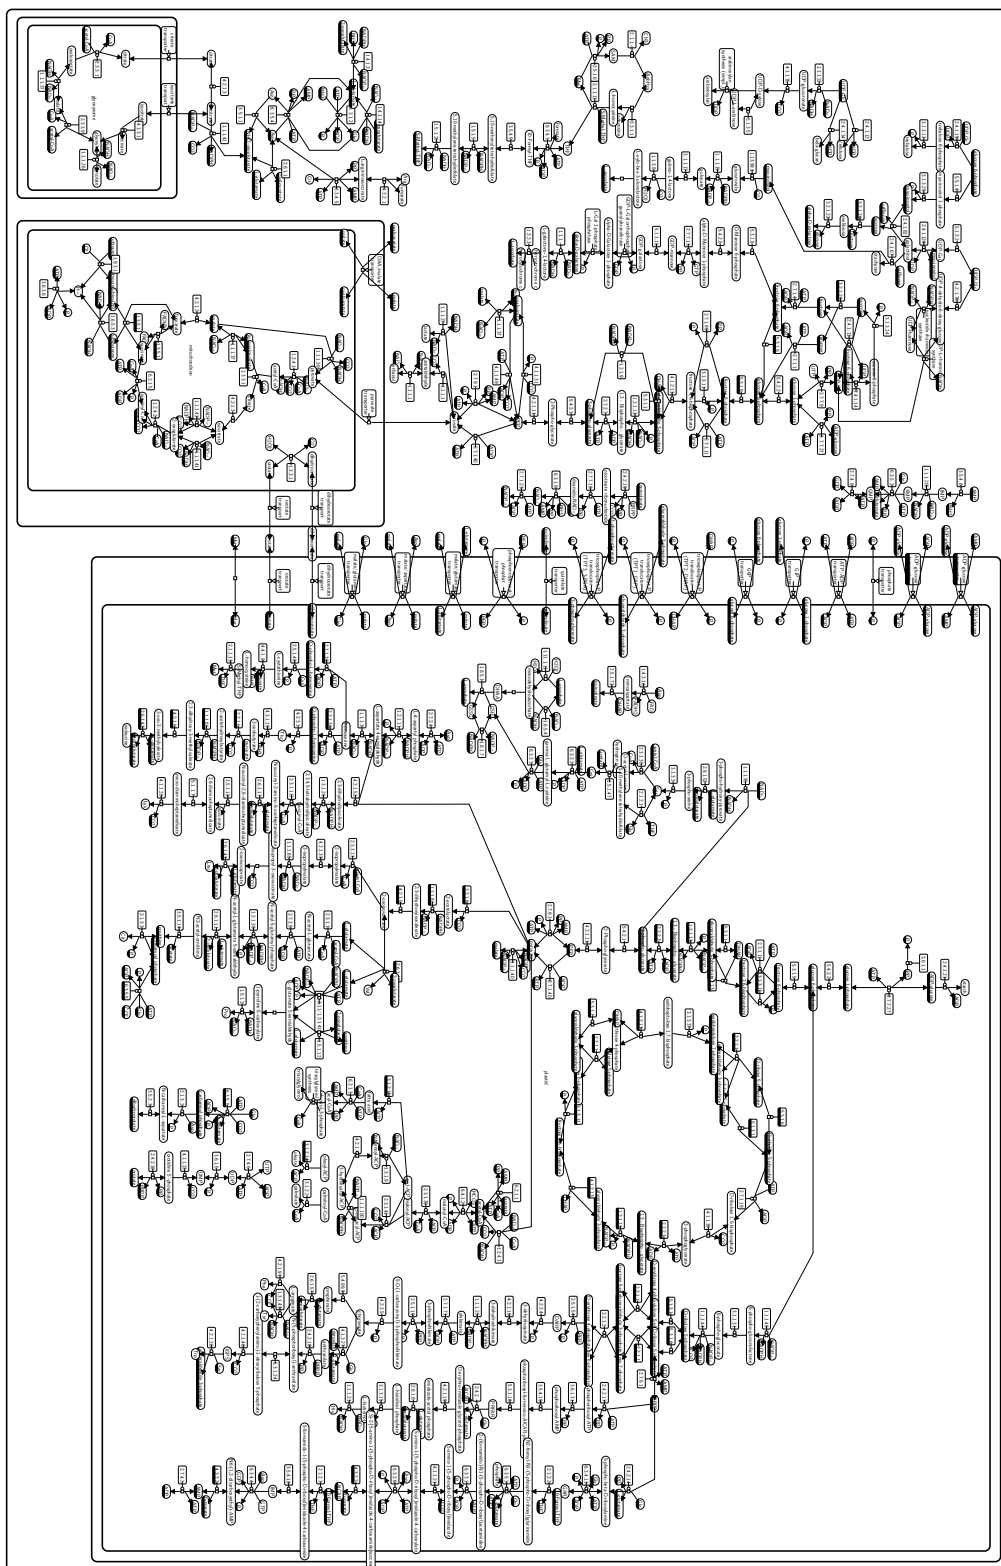



## 5.2 Rendered with the SBGN-ML to sbgntikz converter with the tidy option

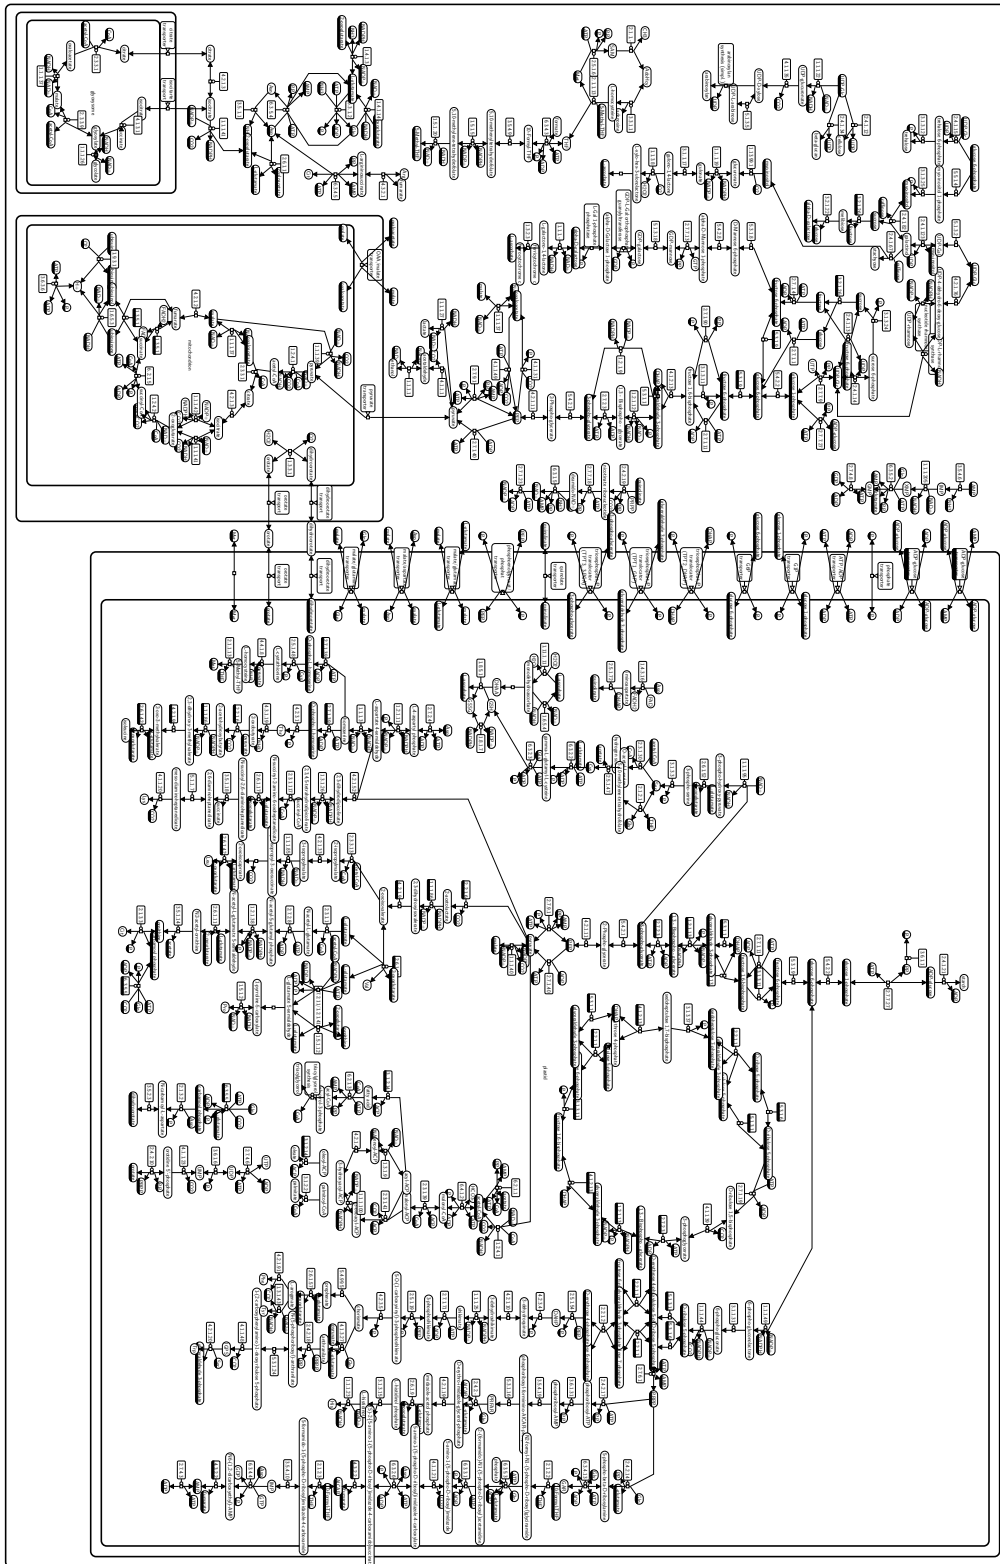

### 5.3 Rendered with SBGN-ED

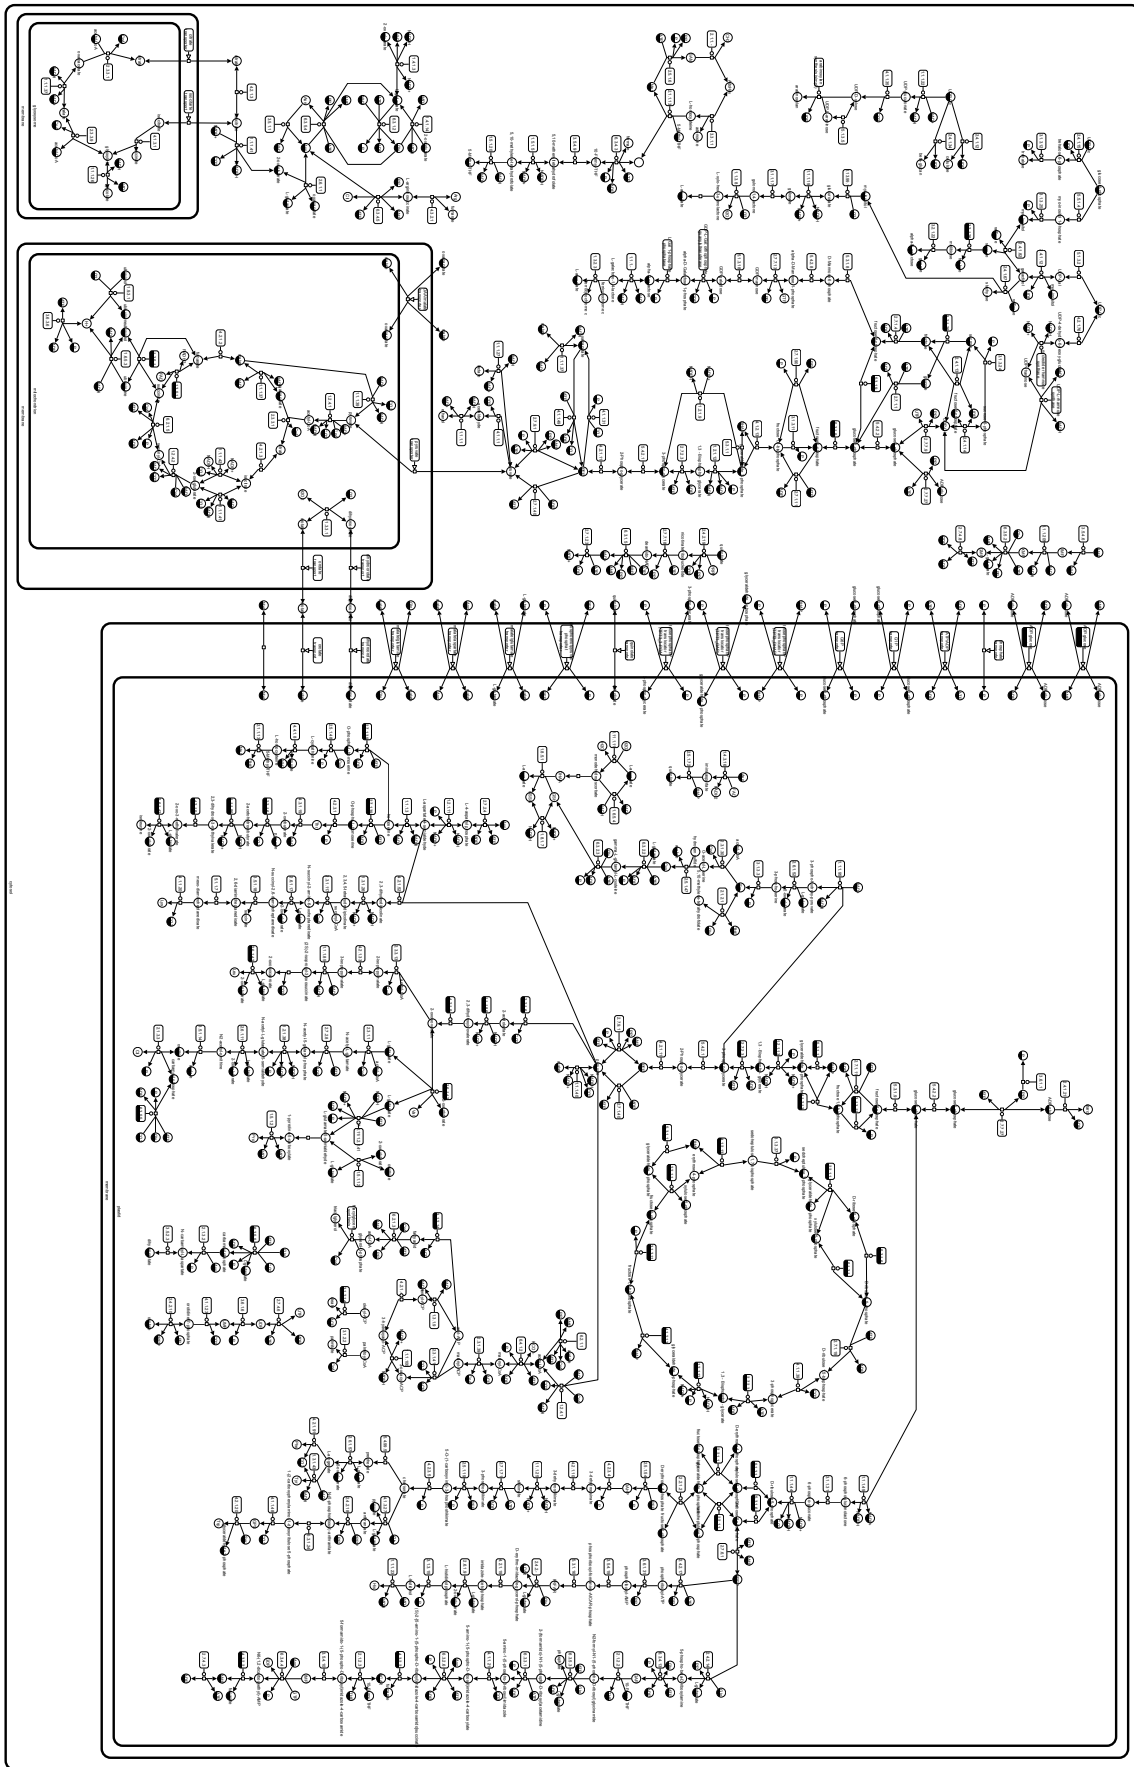

## 6 EGFR-induced signaling (AF map)

### 6.1 Rendered with the SBGN-ML to sbgntikz converter

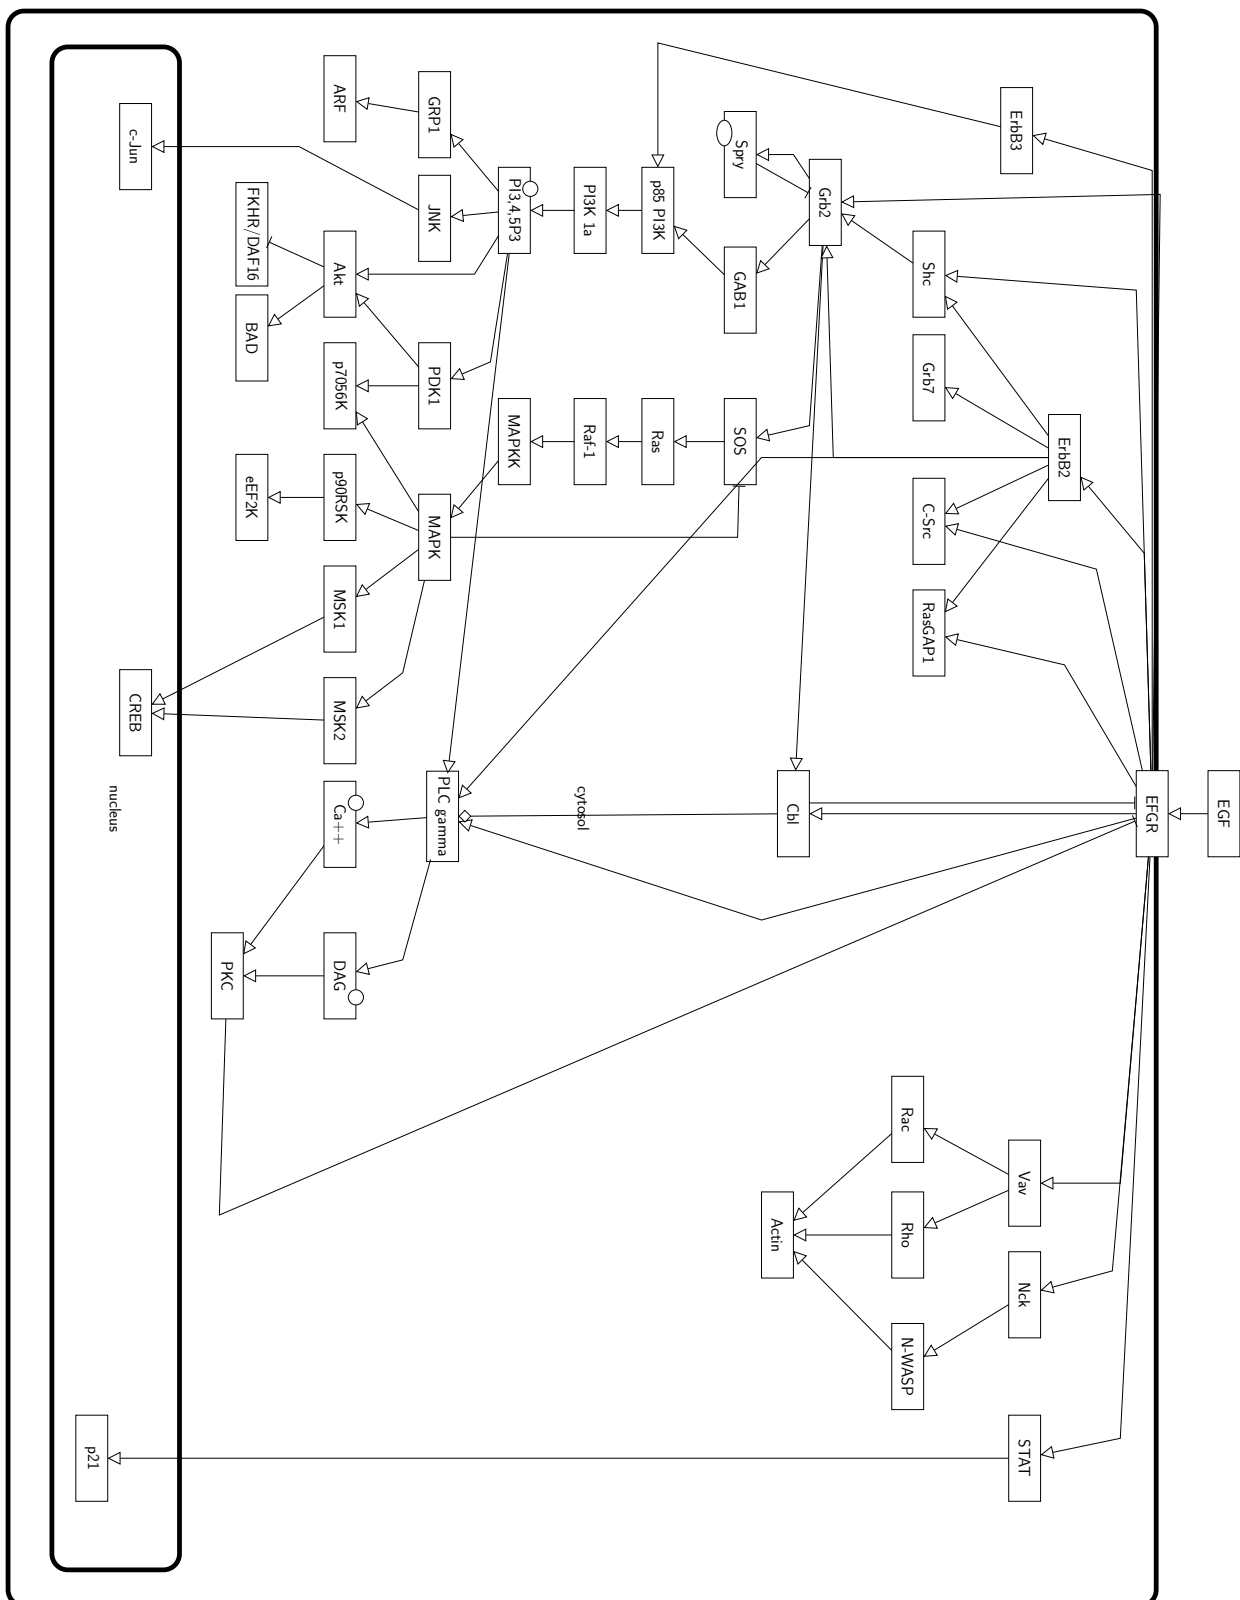

## 6.2 Rendered with the SBGN-ML to sbgntikz converter with the tidy option

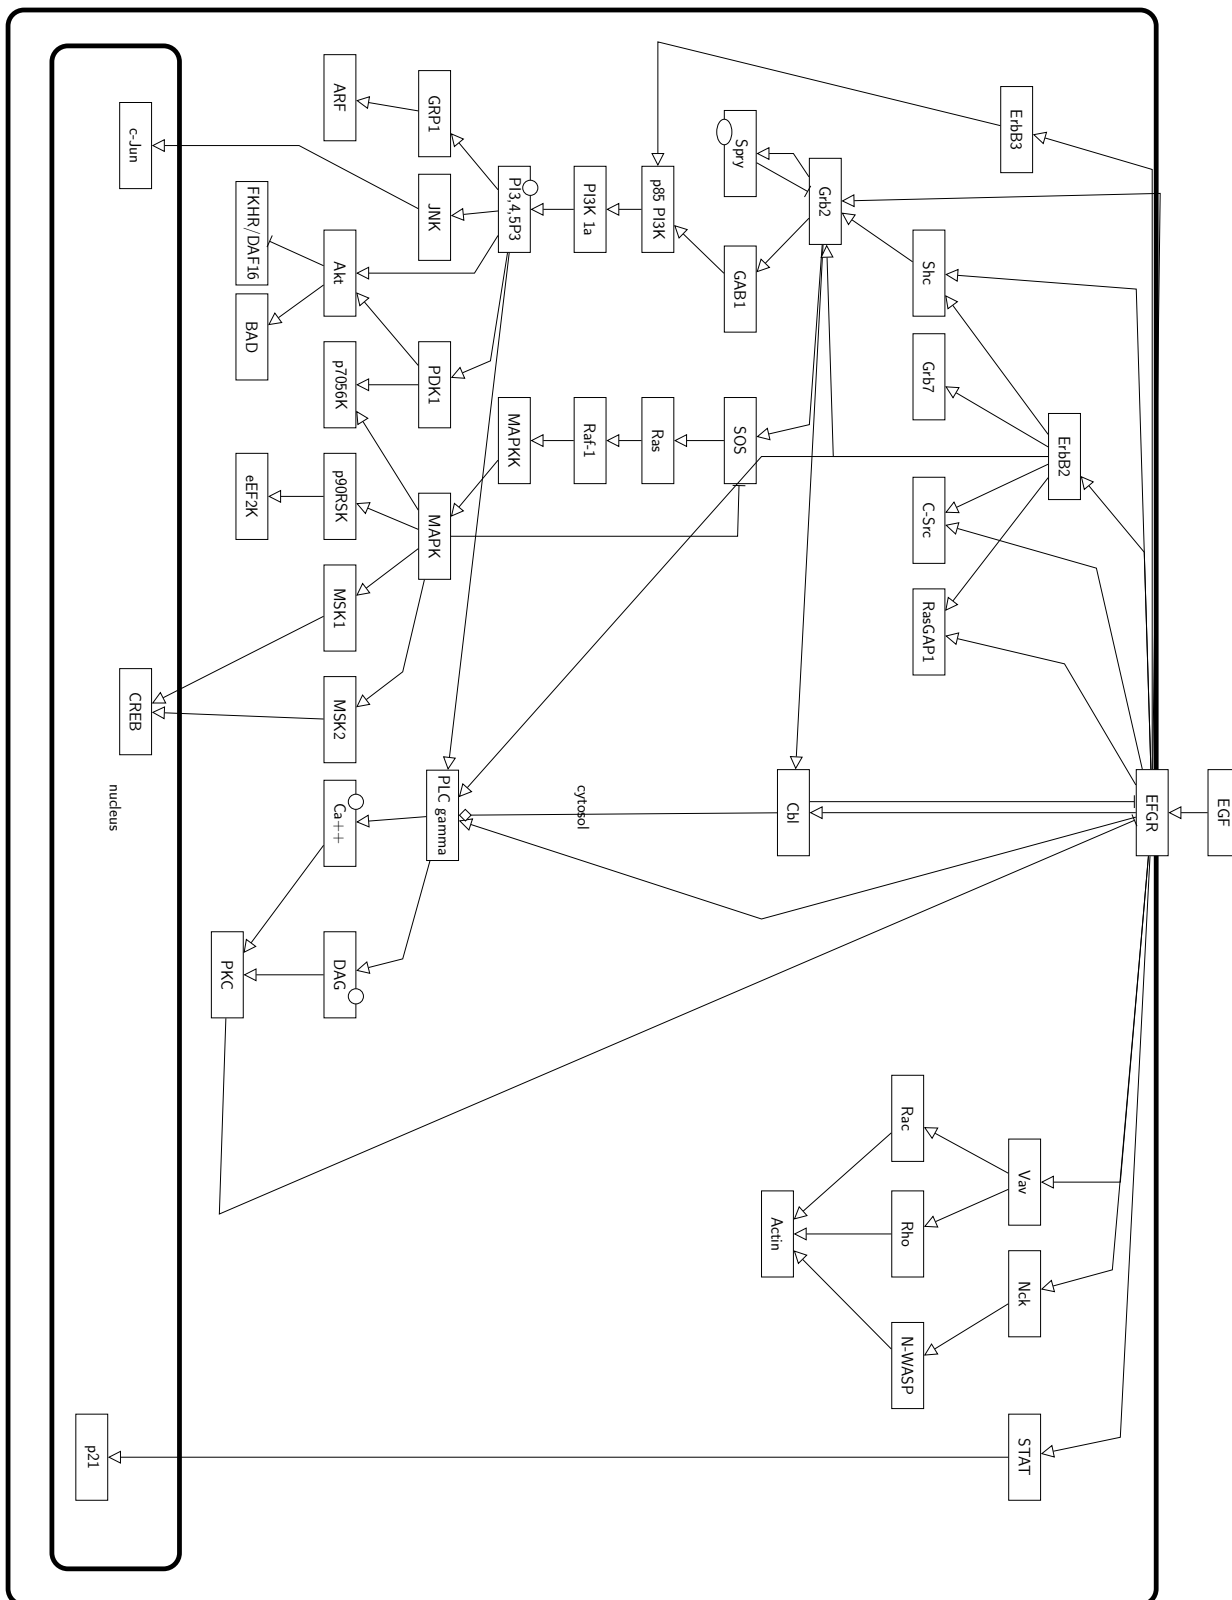

### 6.3 Rendered with SBGN-ED

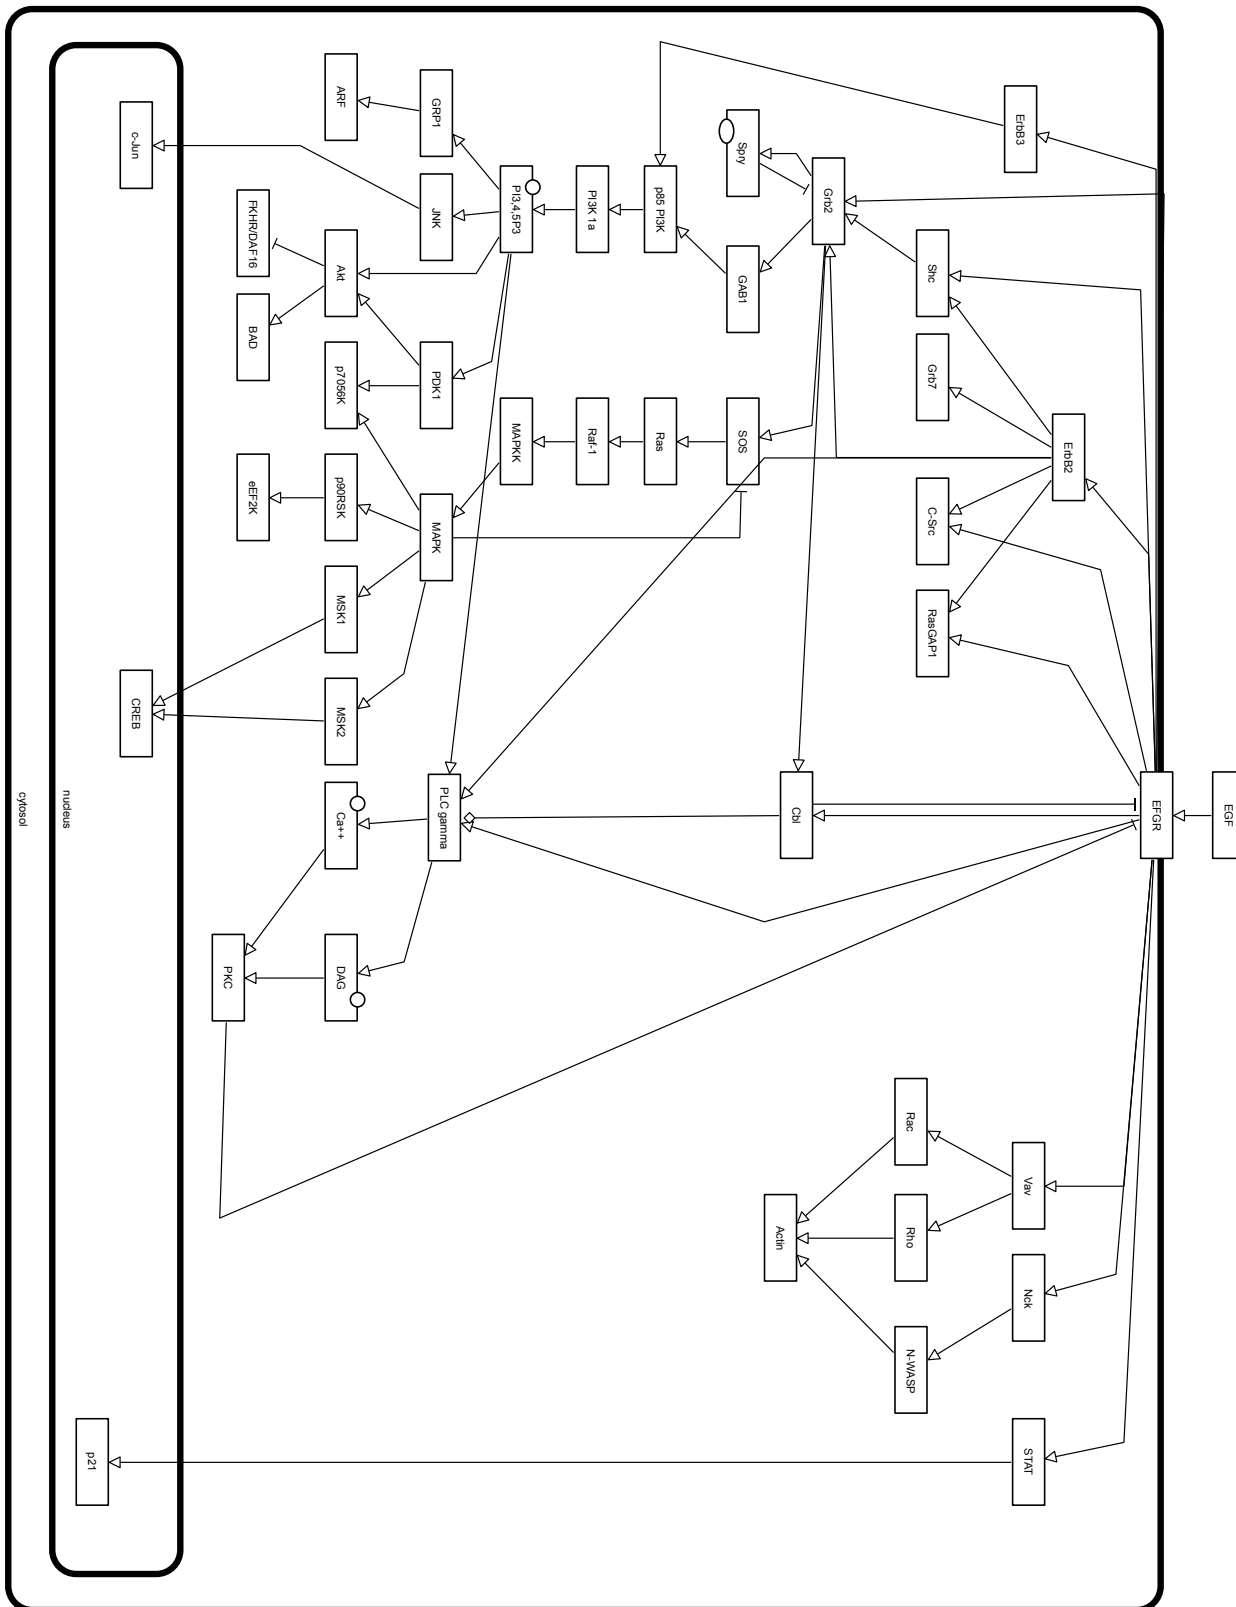

## 7 Glycolysis (PD map)

### 7.1 Rendered with the SBGN-ML to sbgntikz converter

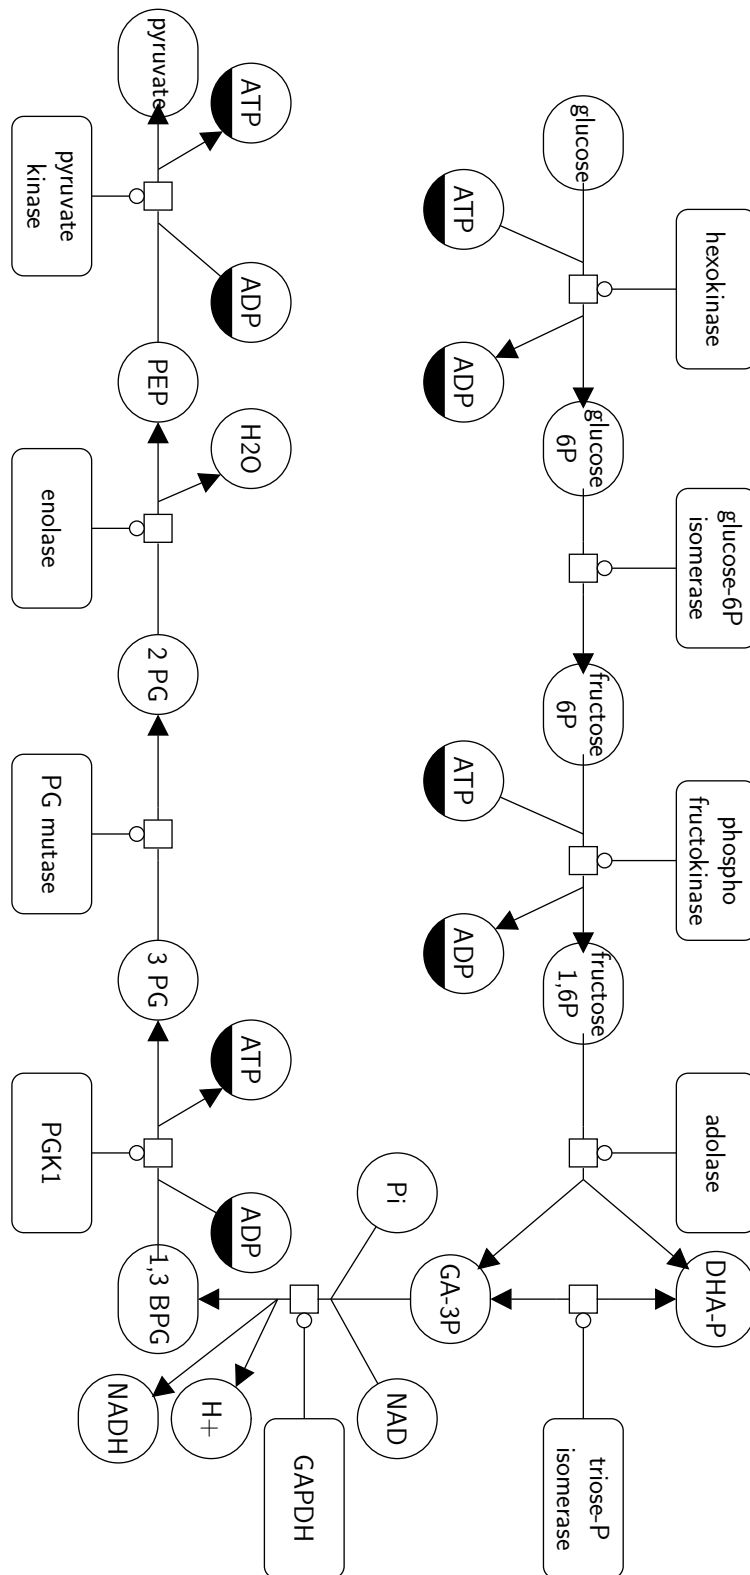

## 7.2 Rendered with the SBGN-ML to sbgntikz converter with the tidy option

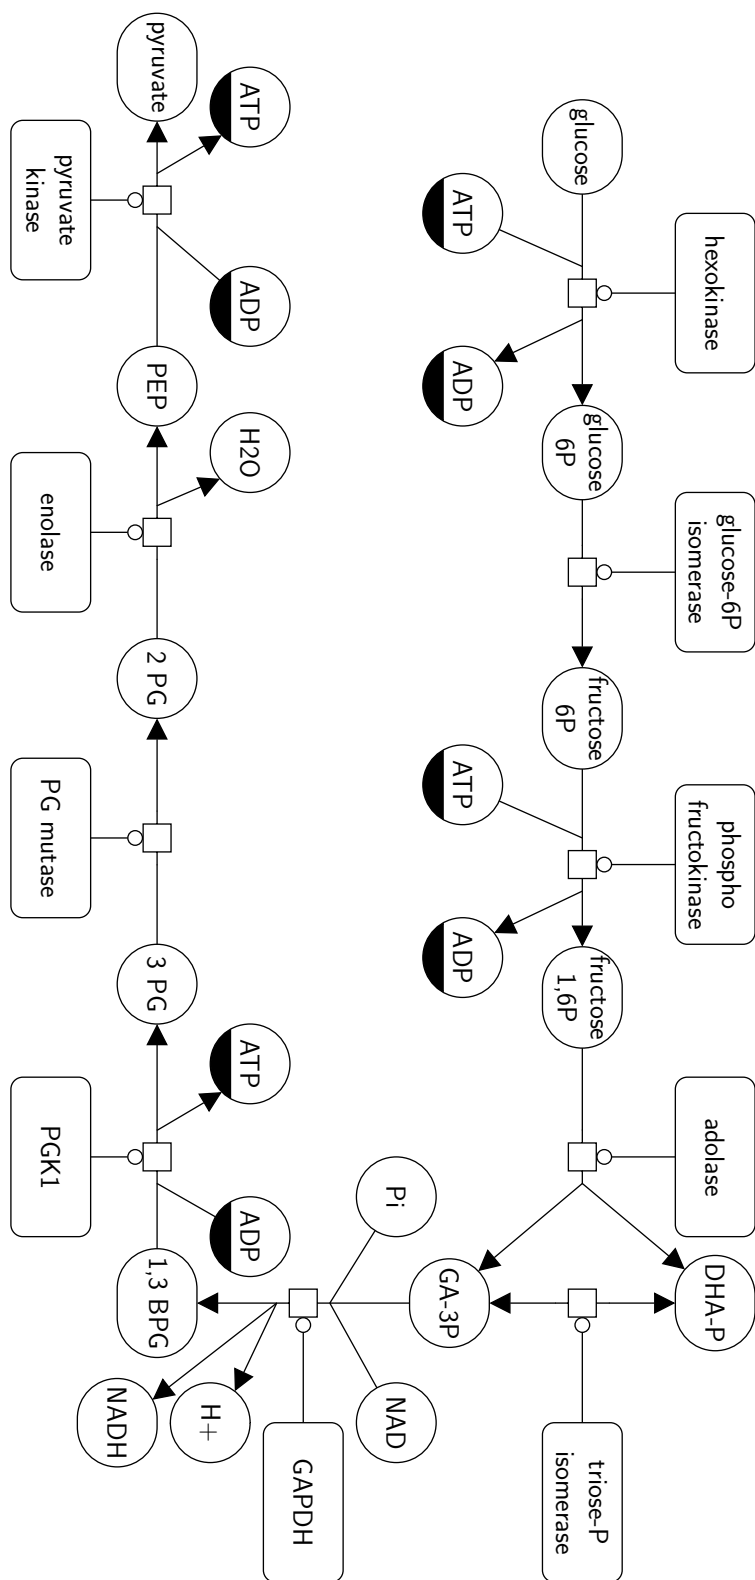

### 7.3 Rendered with SBGN-ED

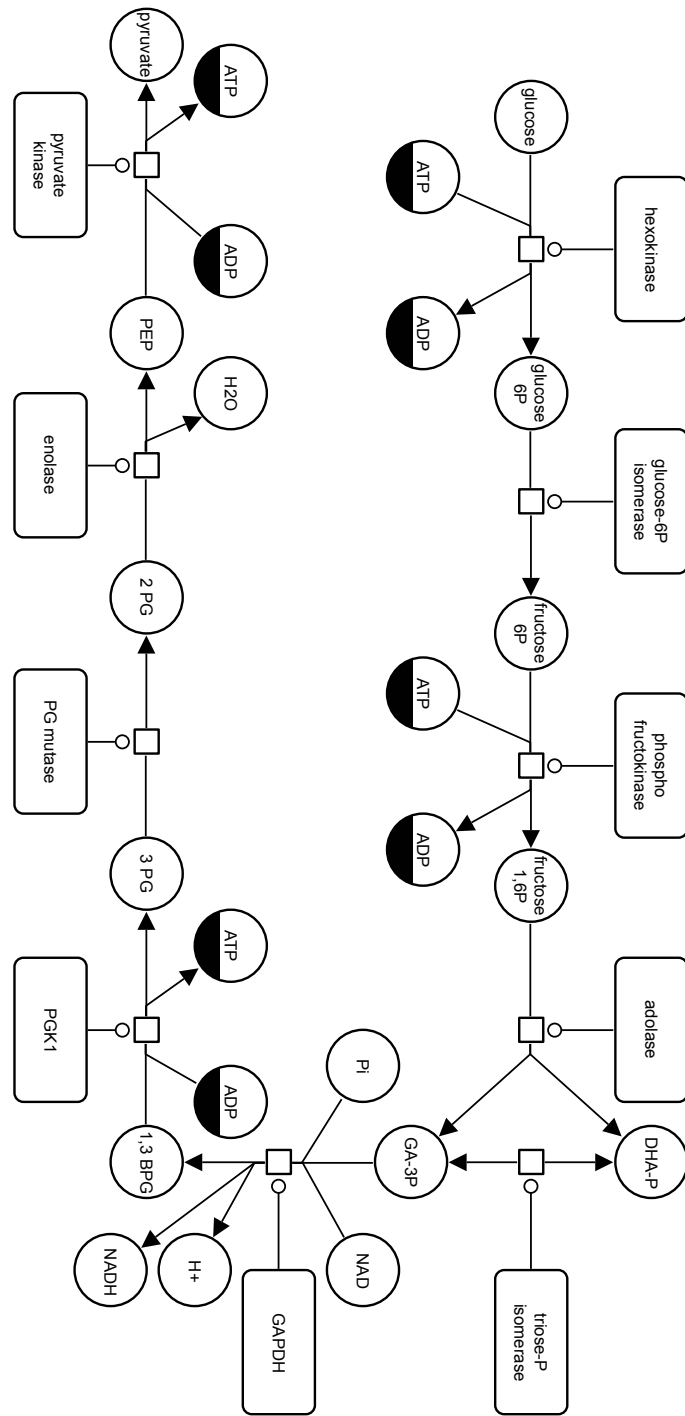



## 8 MAPK cascade (PD map)

### 8.1 Rendered with the SBGN-ML to sbgtikz converter

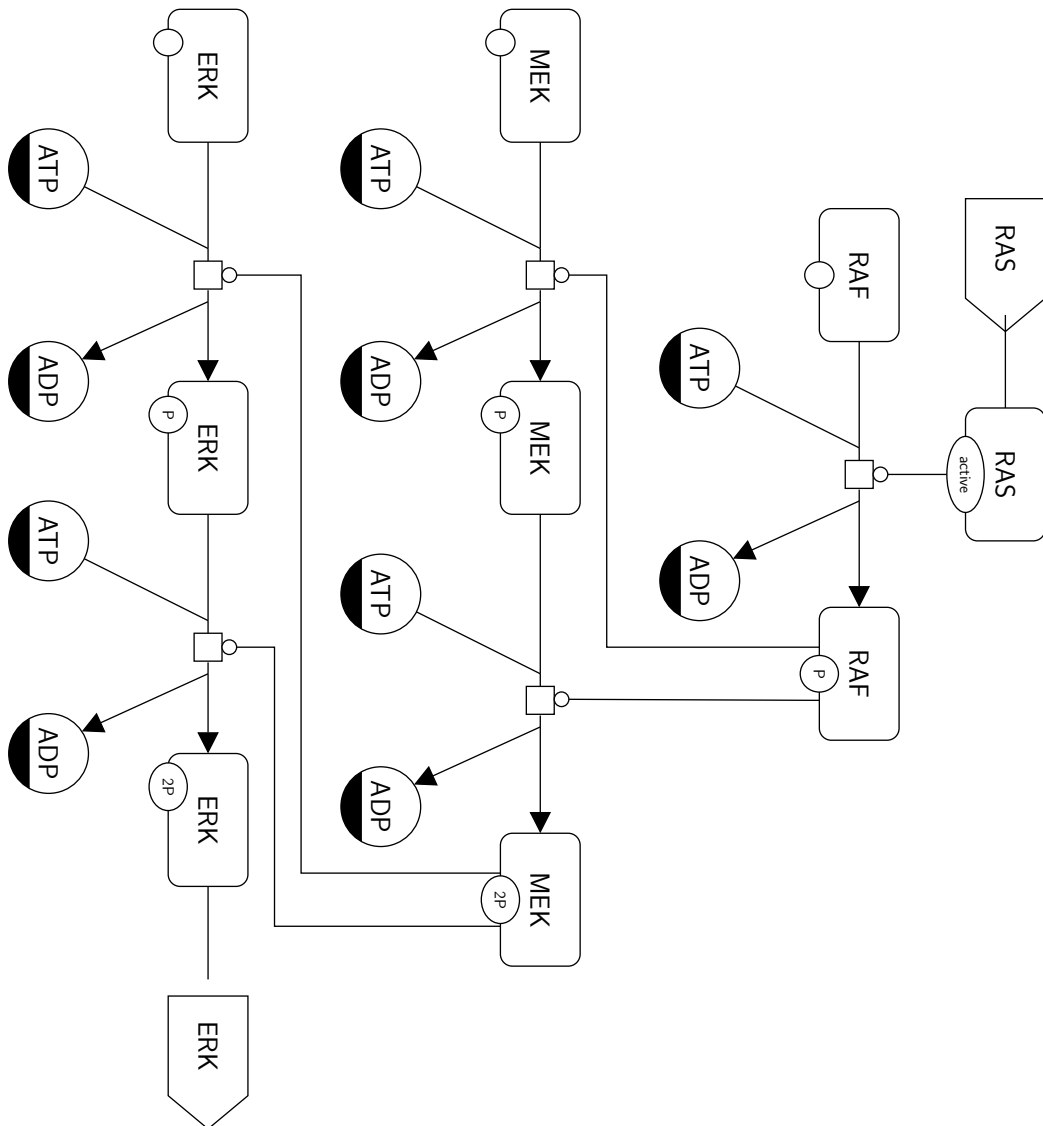

## 8.2 Rendered with the SBGN-ML to sbgntikz converter with the tidy option

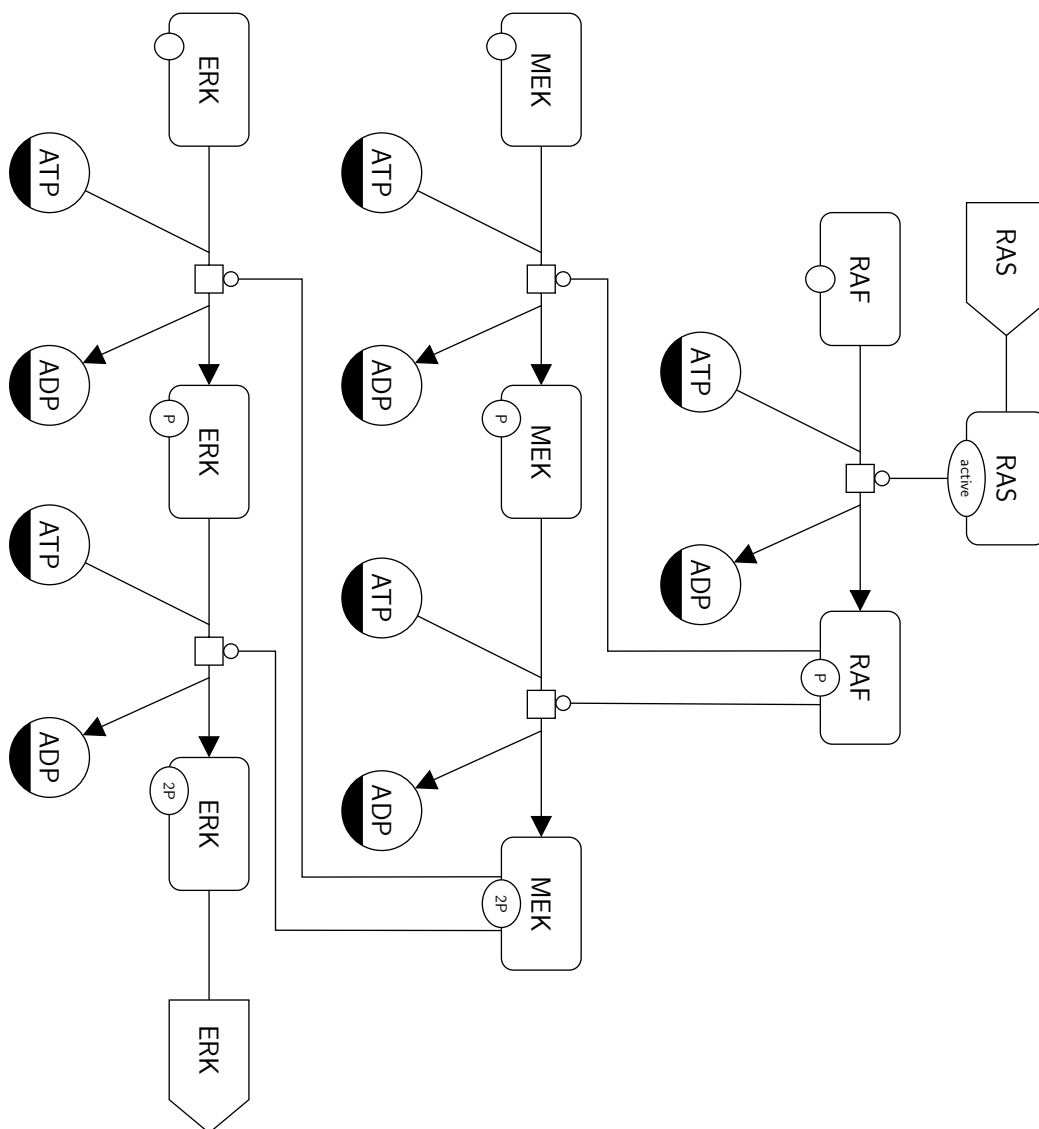

### 8.3 Rendered with SBGN-ED

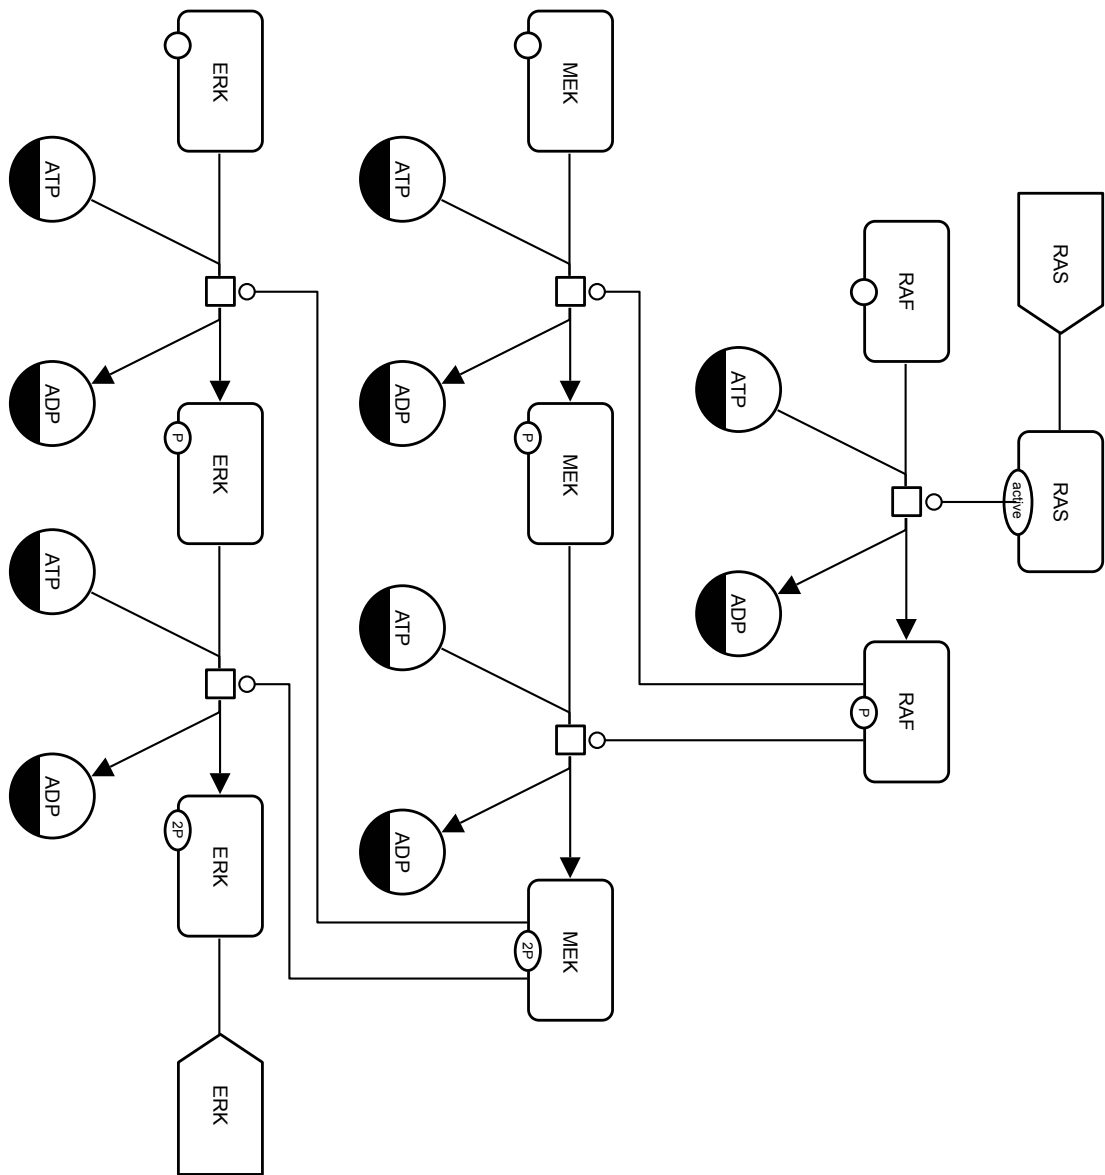

## 9 TGF $\beta$ -induced signaling (AF map)

### 9.1 Rendered with the SBGN-ML to sbgntikz converter

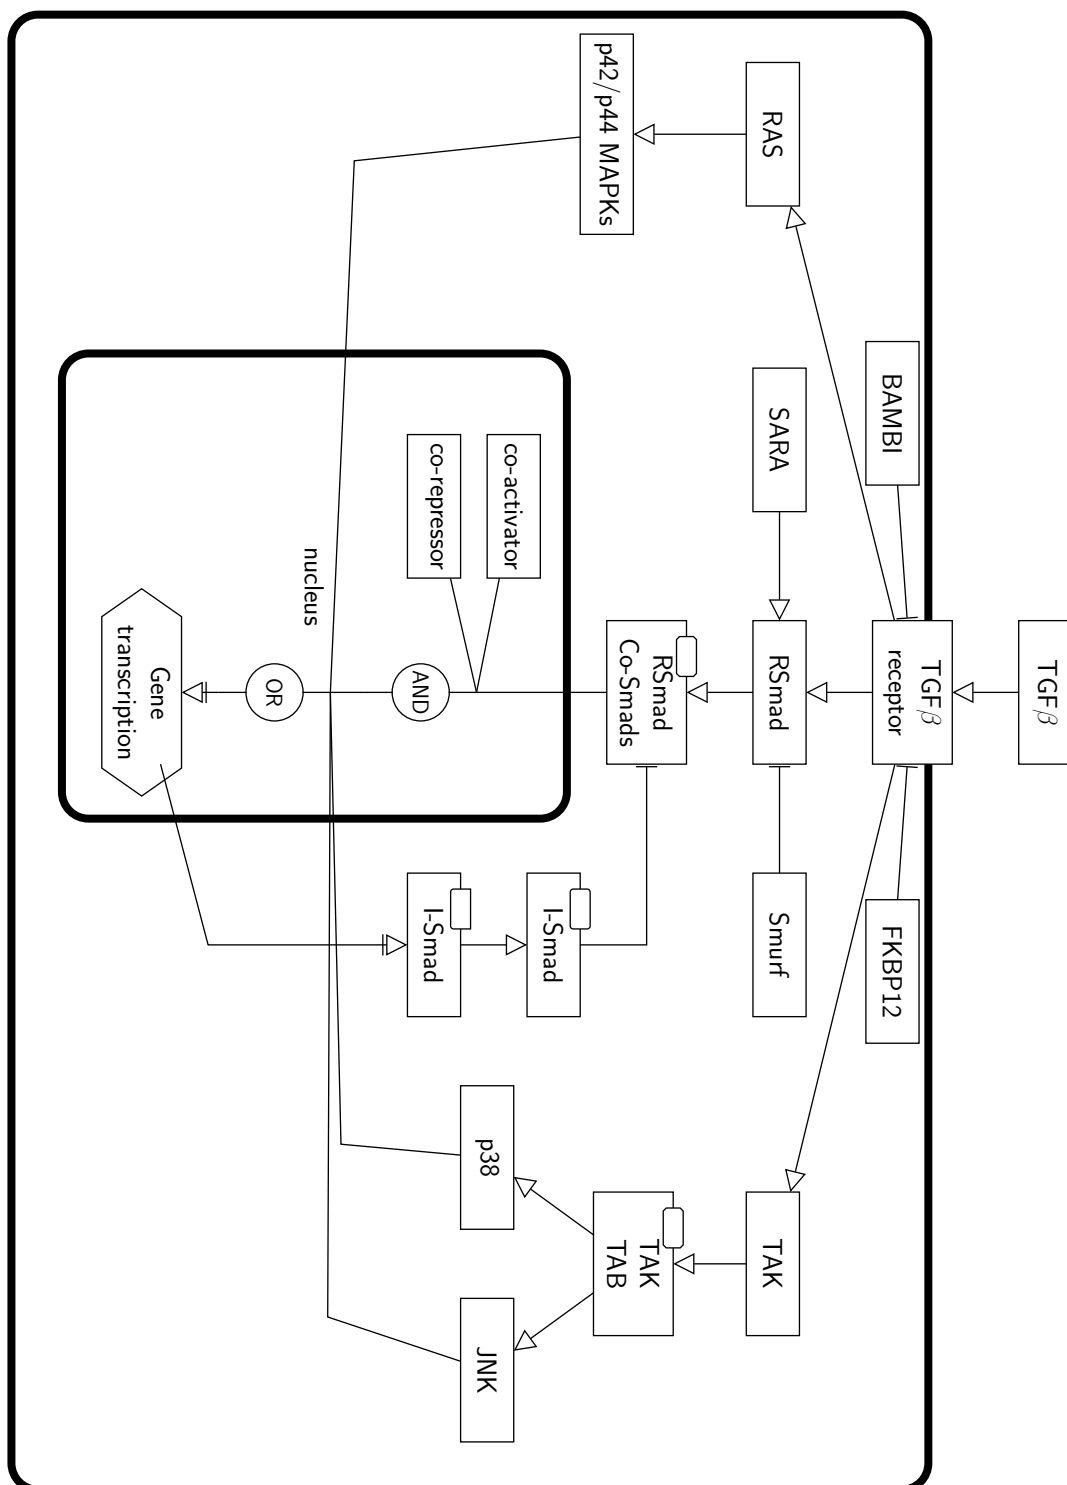

9.2 Rendered with the SBGN-ML to sbgntikz converter with the tidy option

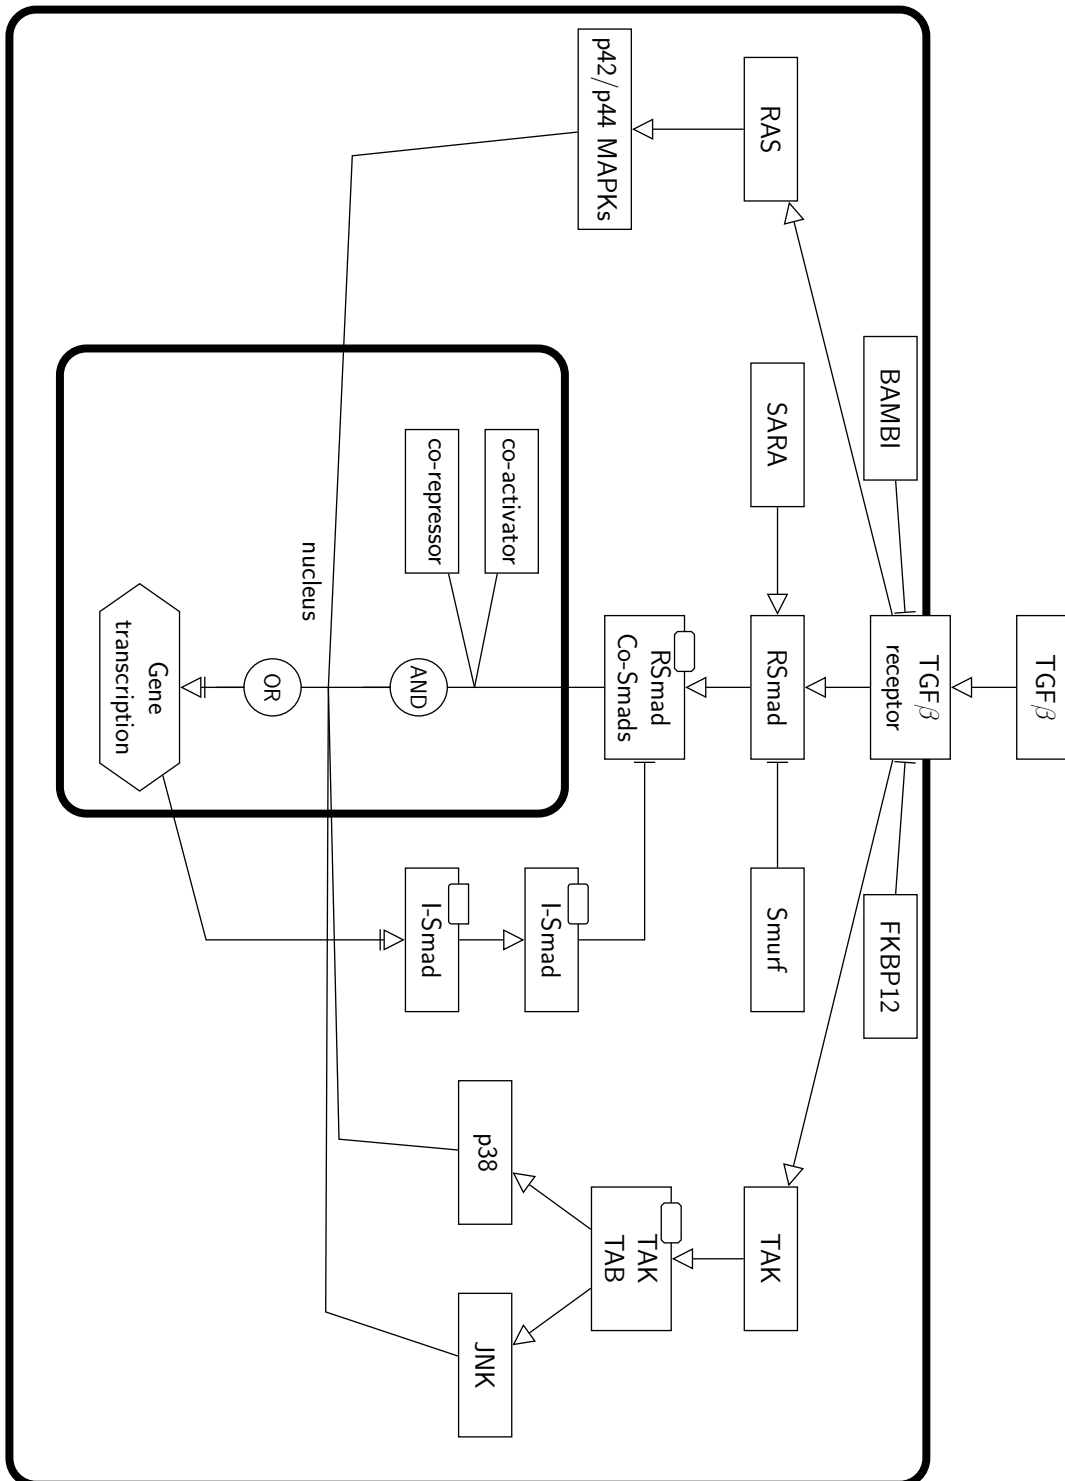

9.3 Rendered with SBGN-ED

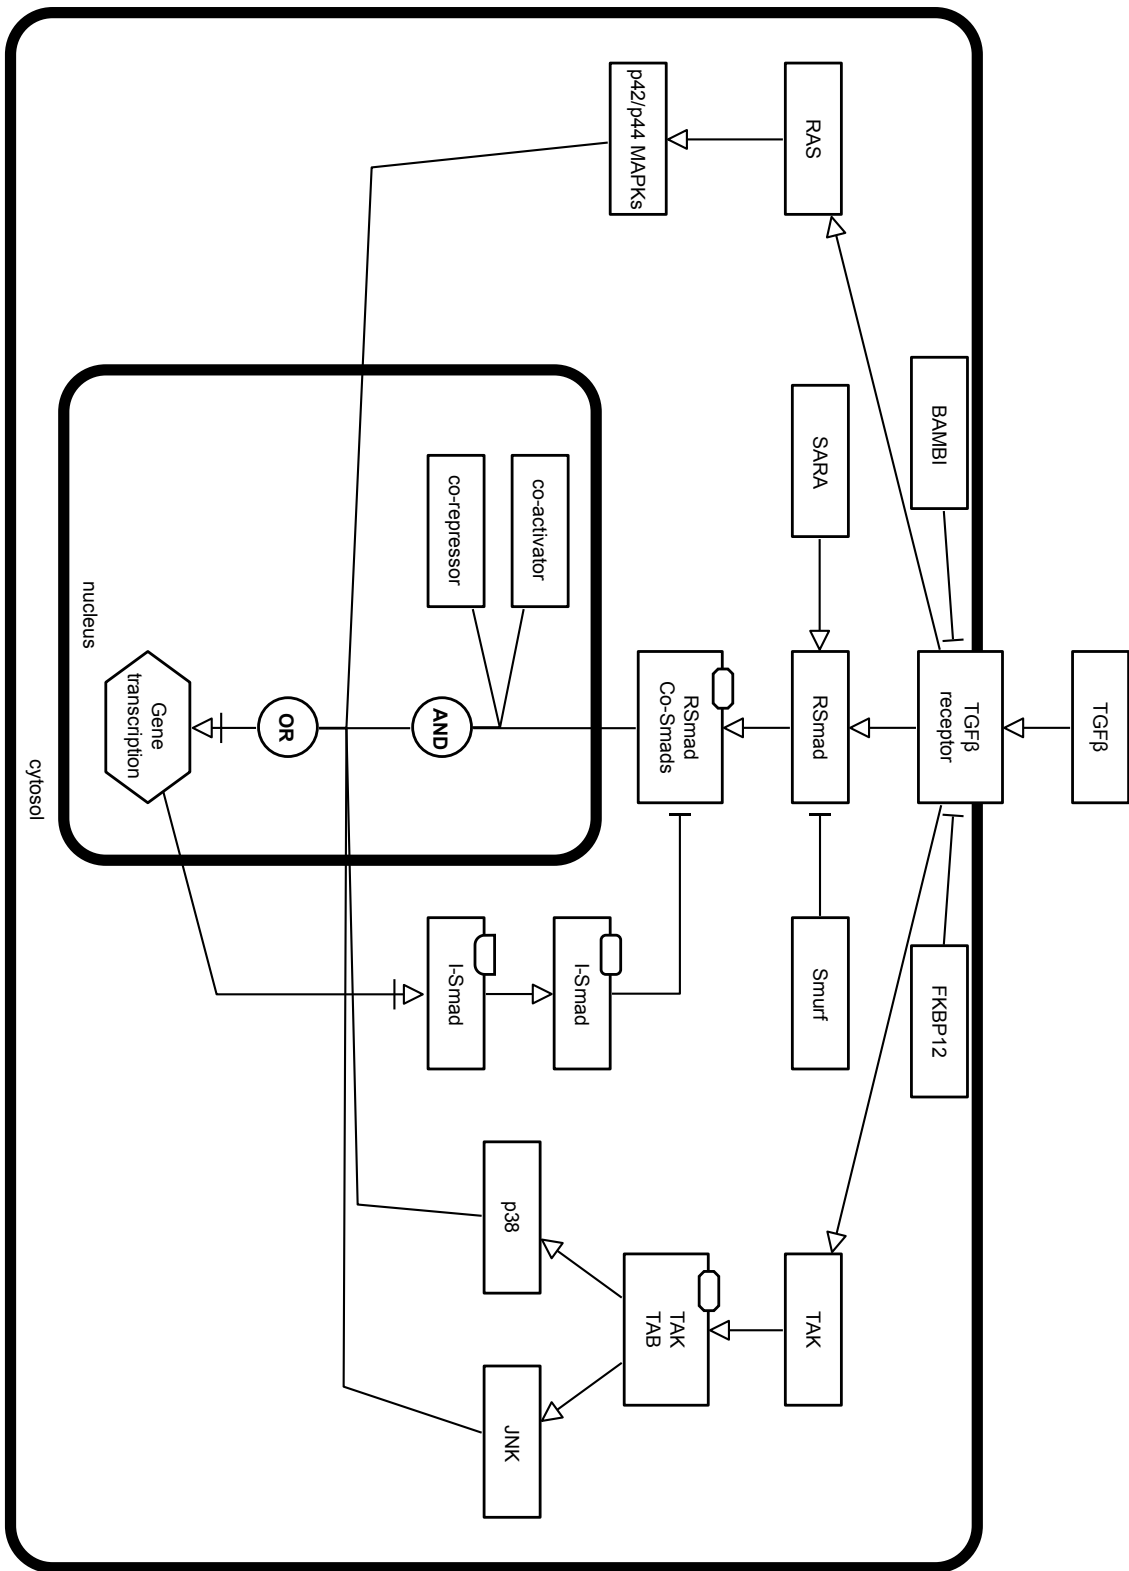

Supplement: bioinformatics_35_21_4499_s2.pdf [file bioinformatics_35_21_4499_s2.pdf]
